# Supplementary material for: Bioactives and functional food ingredients with promising potential for the management of cerebral and myocardial ischemia: a comprehensive mechanistic review
Source: Royal Society of Chemistry journal article supplement (doi:10.1039/d2fo00834c), 2022-01-01
Supplement: d2fo00834c1.pdf [file d2fo00834c1.pdf]

## Supplementary Material

**Table S1: A survey of the anti-ischemia mechanistic studies reported in the literature for the different plant species and their derived bioactives.**

| No.                                                      | Compound/<br>Chemical class                        | Source                                            | Mechanism                                                                                                                                                                                                                                                                                          | Model            | Ref   |
|----------------------------------------------------------|----------------------------------------------------|---------------------------------------------------|----------------------------------------------------------------------------------------------------------------------------------------------------------------------------------------------------------------------------------------------------------------------------------------------------|------------------|-------|
| <b>I. Bioactives for management of cerebral ischemia</b> |                                                    |                                                   |                                                                                                                                                                                                                                                                                                    |                  |       |
| 1                                                        | Totarol<br>(Terpenoid)                             | <i>Podocarpus totara</i> ,<br>F:<br>podocarpaceae | Neuroprotective in cerebral IRI<br>via Activation of Akt/HO-1<br>pathway.                                                                                                                                                                                                                          | OGD and<br>tMCAO | [1]   |
| 2                                                        | Taraxasterol<br>(Terpenoid)                        | <i>Taraxacum officinale</i> , F:<br>Asteraceae    | Neuroprotective in<br>hippocampal neurons via<br>Activation of Nrf2 signalling<br>pathway (ROS↓; MDA↓).                                                                                                                                                                                            | OGD/R            | [2]   |
| 4                                                        | Resveratrol<br>(Terpenoid)                         | Grape<br><i>Vitis vinifera</i> , F:<br>Vitaceae   | Ref to text.                                                                                                                                                                                                                                                                                       | MCAO             | [19]  |
| 5                                                        | Celastrol<br>(Terpenoid)                           | <i>Tripterygium wilfordii</i>                     | Protective effect against<br>cerebral IRI through<br>downregulation of the<br>expression of p-JNK, p-c-Jun<br>and NF-κB.                                                                                                                                                                           | tMCAO/O<br>GD    | [16]  |
| 6                                                        | Asiatic acid<br>(Terpenoid)                        | <i>Centella asiatica</i> , F:<br>Apiaceae         | Neuroprotective against focal<br>cerebral IRI by suppressing<br>mitochondrial damage and<br>MMP-9 activation.                                                                                                                                                                                      | -pMCAO           | [34]  |
| 7                                                        | 11-Keto-β-boswellic<br>acid<br>terpenoid           | <i>Boswellia serrata</i> , F:<br>Burseraceae      | Neuroprotection and anti-<br>inflammatory against cerebral<br>IRI via regulation of the<br>Nrf2/HO-1 pathway.                                                                                                                                                                                      | MCAO             | [112] |
| 8                                                        | Acetyl-11-Keto-β-<br>boswellic acid<br>(Terpenoid) | <i>Boswellia serrata</i> , F:<br>Burseraceae      | AKBA-loaded o-<br>carboxymethyl chitosan<br>nanoparticles (AKBA-NP)<br>neuroprotection, antioxidant<br>and anti-inflammatory against<br>cerebral IRI via increasing<br>nuclear erythroid 2-related<br>factor 2 and heme oxygenase-1<br>expression, and decreasing<br>nuclear factor-kappa B and 5- | MCAO             | [113] |

|    |                                |                                                    |                                                                                                                                                                                                                                             |             |            |
|----|--------------------------------|----------------------------------------------------|---------------------------------------------------------------------------------------------------------------------------------------------------------------------------------------------------------------------------------------------|-------------|------------|
|    |                                |                                                    | lipoxygenase expression.                                                                                                                                                                                                                    |             |            |
| 9  | Andrographolide<br>(Terpenoid) | <i>Andrographis paniculate</i> , F:<br>Acanthaceae | Anti-inflammatory and protective against Cerebral IRI via suppression of NF- $\kappa$ B and microglial activation, and reducing production of cytokines (TNF- $\alpha$ and IL-1 $\beta$ ) and pro-inflammatory factors (PGE <sub>2</sub> ). | pMCAO       | [110]      |
| 10 | Parthenolide<br>(Terpenoid)    | <i>Tanacetum parthenium</i> , F:<br>Asteraceae     | Protection against cerebral IRI through downregulating NF- $\kappa$ B, phosho-p38MAPK, and caspase-1 expressions and ameliorating BBB permeability                                                                                          | MCAO        | [51]       |
| 11 | Ursolic acid<br>(Terpenoid)    | <i>Ocimum forskolei</i> , F:<br>Lamiaceae          | Anti-inflammatory, anti-apoptotic and neuroprotective against cerebral IRI possibly through the HMGB1/TLR4/NF $\kappa$ B signaling pathway.                                                                                                 | MCAO        | [129, 130] |
| 12 | Bilobalide<br>(Terpenoid)      | <i>Ginko biloba</i> , F:<br>Ginkgoaceae            | Protection against alterations in mitochondrial respiratory activity in cerebral IRI via protecting complex I and complex III activities and preserving the energetic pool of tissues.                                                      | OGD/R       | [119]      |
| 13 | Nomilin<br>(Terpenoid)         | <i>Citrus limon</i> , F:<br>Rutaceae               | Protective in cerebral IRI via regulation of Nrf2/NQO1 pathway.                                                                                                                                                                             | OGD<br>MCAO | [80]       |
| 14 | Paeoniflorin<br>(Terpenoid)    | <i>Paeonia lactiflora</i> , F:<br>Paeoniaceae      | Inhibition of astrocytic activation in cerebral IRI via regulating the Ca <sup>2+</sup> /CaMKII/CREB signaling pathway and reversing the increased expression of astrocyte marker protein GFAP.                                             | tMCAO       | [76]       |
| 15 | Carnosic acid<br>(Terpenoid)   | <i>Rosmarinus officinalis</i> , F:<br>Lamiaceae    | Protective against After liver IRI, via anti-oxidative, anti-apoptotic<br>-Anti-inflammatory via inactivating NF- $\kappa$ B signaling                                                                                                      | MCAO        | [47]       |

|    |                           |                                                 |                                                                                                                                                                                                                                       |                  |       |
|----|---------------------------|-------------------------------------------------|---------------------------------------------------------------------------------------------------------------------------------------------------------------------------------------------------------------------------------------|------------------|-------|
|    |                           |                                                 | pathway, leading to down-regulation of pro-inflammatory cytokines releasing.                                                                                                                                                          |                  |       |
| 16 | Linalool terpenoid        | <i>Lavandula officinalis</i> , F: Lamiaceae     | Neuroprotective in cerebral IRI via reducing pro-inflammatory markers, and caused Nrf2 subcellular redistribution.                                                                                                                    | MCAO             | [82]  |
| 17 | Senkyunolide I (Terpene)  | <i>Ligusticum chuanxiong</i> , F: Apiaceae      | Neuroprotective, anti-oxidant and anti-apoptotic against cerebral IRI (activate the Nrf2/ARE pathway by up-regulating the phosphorylation of Erk1/2 and inducing Nrf2 nuclear translocation with enhanced HO-1 and NQO1 expressions). | MCAO             | [108] |
| 18 | Tanshinone A (Terpenoid)  | <i>Salvia miltiorrhiza</i> , F: Lamiaceae       | Ref to text.<br>-Suppression of NF-κB expression (MDA↓; SOD↑)<br>- Attenuation of brain oedema formation (ICAM-1↓; MMP-9↓; iNOS↓).                                                                                                    | -pMCAO<br>-tMCAO | [7]   |
| 19 | Ligustrazine (Terpenoid)  | <i>Ligusticum chuanxiong</i> , F: Apiaceae      | Protection against cerebral endothelial cells injury via the inhibition of the Rho/ROCK signaling pathway (SOD↑; MDA↓; iNOS↓) .                                                                                                       | OGD/R            | [11]  |
| 20 | Z-ligustilide (Terpenoid) | <i>Rhizoma Chuanxiong</i> , F: Apiaceae         | Ref to text                                                                                                                                                                                                                           |                  | [1]   |
| 21 | Triptolide (Terpenoid)    | <i>Tripterygium wilfordii</i> , F: Celastraceae | Anticytotoxic and anti-apoptotic against cerebral IRI via inhibiting NF-κB and p38MAPK signaling pathways.                                                                                                                            | tMCAO/O GD       | [17]  |
| 22 | Safranal (Terpenoid)      | <i>Crocus sativus</i> , F: Iridaceae            | Protective against skeletal muscle IRI via inhibition of oxidative stress, muscle contractility, I <sub>Ca-L</sub> and the regulation of Ca <sup>2+</sup> homeostasis                                                                 | ISO-induced      | [63]  |
| 23 | Britanin (Terpenoid)      | <i>Inula linearifolia</i> , F: Asteraceae       | -Neuroprotective against cerebral IRI via binding Keap1, inhibiting Keap1-mediated ubiquitination of Nrf2 and                                                                                                                         | OGD/R and MCAO/R | [116] |

|    |                                                                        |                                                            |                                                                                                                                                                                                                                                                     |                   |       |
|----|------------------------------------------------------------------------|------------------------------------------------------------|---------------------------------------------------------------------------------------------------------------------------------------------------------------------------------------------------------------------------------------------------------------------|-------------------|-------|
|    |                                                                        |                                                            | inducing Nrf2/ HO-1 pathway                                                                                                                                                                                                                                         |                   |       |
| 24 | Ginkgolide K<br>(Terpenoid)                                            | <i>Ginkgo pilopa</i> , F:<br><i>Ginkgoaceae</i>            | Anti-oxidant and protective against cerebral muscle IRI via reversed the level of MDA, NO and NOS                                                                                                                                                                   | MCAO              | [43]  |
| 25 | <b>Salvianolic acid A</b><br>(Phenolic)                                | <i>Salvia miltiorrhiza</i> , F:<br>Lamiaceae               | Ref to text                                                                                                                                                                                                                                                         |                   | [8]   |
| 26 | Emodin<br>(Phenolic)                                                   | <i>Polygonum multiflorum</i><br>Thunb., F:<br>Polygonaceae | anti-apoptotic against Photothrombotic cortical ischaemia through activation of the PI3K/Akt signaling pathway                                                                                                                                                      | glutamate-induced | [9]   |
| 27 | Magnesium lithospermate B<br>(Phenolic)                                | <i>Salvia miltiorrhiza</i> , F:<br>Lamiaceae               | Anti-apoptosis and attenuation of cerebral excitatory neurotoxicity during IRI through the regulation of miR-107/GLT-1 pathway.                                                                                                                                     | tMCAO             | [14]  |
| 28 | 2,3,5,4'-Tetra hydroxystilbene-2-O- $\beta$ -D-glucoside<br>(Phenolic) | <i>Polygonum multiflorum</i> , F:<br>Polygonaceae          | Cytoprotective in focal cerebral IRI via Down-regulation of JNK, SIRT1, and NF- $\kappa$ B pathways                                                                                                                                                                 | OGD/R MCAO        | [5]   |
| 29 | Paeonol<br>(Phenolic)                                                  | <i>Paeonia suffruticosa</i> , F:<br>Paeoniaceae            | Anti-oxidant and anti-apoptotic against brain ischemia injury by increasing antioxidase activity, reducing oxygen-free radicals-induced damage, and inhibiting cell apoptosis -neuroprotective effect by restraining calcium overload and decreasing excitotoxicity | OGD<br><br>BCCAO  | [45]  |
| 30 | Osthole<br>(Phenolic)                                                  | <i>Cnidium monnieri</i> , F:<br>Apiaceae                   | Anti-oxidant and Neuroprotective against cerebral IRI via activating Nrf2 pathway                                                                                                                                                                                   | BCAO              | [117] |
| 31 | Tetrahydroxystilbene<br>(Phenolic)                                     | <i>Polygonum multiflorum</i> , F:<br>Polygonaceae          | Anti-apoptotic against focal cerebral IRI via inhibition of iNOS mRNA expression and NF- $\kappa$ B                                                                                                                                                                 | OGD               | [5]   |
| 32 | Cinnamophilin neolignane (Phenolic)                                    | <i>Cinnamomum Philippinense</i> , F:<br><i>Lauraceae</i>   | Protective against transient focal cerebral ischemia via antioxidant and anti-                                                                                                                                                                                      | (MCAO)<br>OGD     | [24]  |

|    |                                     |                                                         |                                                                                                                                                                                                                                                                      |                  |      |
|----|-------------------------------------|---------------------------------------------------------|----------------------------------------------------------------------------------------------------------------------------------------------------------------------------------------------------------------------------------------------------------------------|------------------|------|
|    |                                     |                                                         | inflammatory effects(inhibited (TNF- $\alpha$ ), nitrite/nitrate, interleukin-6 (IL-6))                                                                                                                                                                              |                  |      |
| 33 | Cinnamophilin (phenolic)            | Cinnamon<br><i>Cinnamomum zeylanicum</i> , F: Lamiaceae | Protective against transient focal cerebral IRI via inhibition of COX-1 and 5-lipoxygenase                                                                                                                                                                           | OGD/R            | [24] |
| 34 | Schisandrin B (Phenolic)            | <i>Schisandra chinensis</i> , F: Schisandraceae         | Neuroprotective against transient focal <b>cerebral</b> ischemia via inhibiting inflammatory markers (TNF- $\alpha$ ↓; IL-1 $\beta$ ↓; MMP-2↓; MMP-9↓)                                                                                                               | tMCAO            | [18] |
| 35 | Epigallocatechin gallate (Phenolic) | Green Tea<br><i>Camellia thinensis</i> , F: Theaceae    | Ref to text                                                                                                                                                                                                                                                          |                  |      |
| 36 | Shikonin (Phenolic)                 | <i>Lithospermum erythrorhizon</i> , F: Boraginaceae     | Anti-oxidant and protective against <b>cerebral</b> IRI via reducing NDS, MDA and ROS) and upregulating SOD, catalase, GSH-Px activities                                                                                                                             | MCAO             | [44] |
| 37 | Paeonol (Phenolic)                  | <i>Paeonia suffruticosa</i> , F: Paeoniaceae            | Anti-oxidant and anti-apoptotic against brain ischemia injury by increasing antioxidase activity, reducing oxygen-free radicals-induced damage, and inhibiting cell apoptosis. Neuroprotective effect by restraining calcium overload and decreasing excitotoxicity. | OGD<br><br>BCCAO | [45] |
| 38 | Curculigoside A (Phenolic)          | <i>Curculigo Orchioides</i> , F: Hypoxidaceae           | Antiproliferative and protective against cerebral IRI through inducing angiogenesis <i>in vitro</i> via a prograded VCAM-1/Egr-3/CREB/VEGF signaling axis.                                                                                                           | MCAO<br>OGD      | [78] |
| 39 | Theaflavin (Phenolic)               | <i>Camellia sinensis</i> , F: Theaceae                  | Antiproliferative and anti-apoptotic in cerebral IRI decreasing oxidative stress.                                                                                                                                                                                    | MCAO             | [74] |
| 40 | Salidroside (Phenolic)              | <i>Rhodiola rosea</i> , F: Crassulaceae                 | neuroprotective for cerebral IRI due to inhibitions of RIP140-mediated inflammation                                                                                                                                                                                  | MCAO             | [72] |

|    |                                    |                                                   |                                                                                                                                                                           |           |          |
|----|------------------------------------|---------------------------------------------------|---------------------------------------------------------------------------------------------------------------------------------------------------------------------------|-----------|----------|
|    |                                    |                                                   | and apoptosis.                                                                                                                                                            |           |          |
| 41 | Gastrodin<br>(Phenolic)            | <i>Gastrodia elata</i> ,<br>F: Orchidaceae        | neuroprotective for cerebral IRI via a reduction in glutamate level.                                                                                                      | HII       | [73]     |
| 42 | Rosmarinic acid<br>(Phenolic)      | <i>Salvia officinalis</i> , F:<br>Lamiaceae       | NeuroProtective, anti-oxidant and anti-apoptotic against focal cerebral IRI via inducing Nrf2/HO-1 pathway through the PI3K/Akt signaling.                                | MCAO      | [85, 86] |
| 43 | Lyciumamide A<br>(Phenolic)        | <i>Lycium barbarum</i> fruits,<br>F: Solanaceae   | NeuroProtective, anti-oxidant and anti-apoptotic against focal cerebral IRI via induction of the Nrf2/HO-1 pathway (increasing nuclear Nrf2 and cytoplasmic HO-1 levels). | MCAO      | [87]     |
| 44 | Mangiferin<br>Xanthone, (Phenolic) | <i>Mangifera indica</i> , F:<br>Anacardiaceae     | Anti-inflammatory and protective against cerebral IRI via enhancing Nrf2/HO-1 pathway.                                                                                    | MCAO      | [88]     |
| 45 | Procyanidin B2<br>(Phenolic)       | Grapes<br><i>Vitis vinifera</i> , F:<br>Vitaceae  | Neuroprotection against cerebral IRI via activation of NF-E2-related factor pathway.                                                                                      | MCAO      | [89]     |
| 46 | Chlorogenic acid<br>(Phenolic)     | <i>O. forskolei</i> , F:<br>Lamiaceae             | Anti-apoptotic and anti-inflammatory against cerebral IRI via mediating Nrf2 pathway.                                                                                     | MCAO      | [91, 92] |
| 47 | Corilagin<br>(Phenolic)            | <i>Phyllanthus emblica</i> , F:<br>Phyllanthaceae | Anti-apoptotic and anti-inflammatory against cerebral IRI via attenuating oxidative stress and enhancing angiogenesis via activation of Nrf2 signaling pathway.           | MCAO      | [100]    |
| 48 | Alpha tocopherol<br>(Phenolic)     | <i>Rosmarinus officinalis</i> , F:<br>Lamiaceae   | Anti-oxidant and neuroprotective from cerebral IRI via reduction of cleaved caspase-3 and LC3-II.                                                                         | tMCAO     | [93]     |
| 49 | Gallic acid<br>(Phenolic)          | <i>Camellia sinensis</i> , F:<br>Theaceae         | protected against cerebral IRI via activate Nrf2, modulating mitochondria dysfunction, reducing oxidative stress and suppressing neural cell apoptosis.                   | MCAO      | [74]     |
| 50 | Honokiol                           | Magnolia                                          | Protective against renal IRI via                                                                                                                                          | Bilateral | [54]     |

|    |                                       |                                                   |                                                                                                                                                                                                 |              |          |
|----|---------------------------------------|---------------------------------------------------|-------------------------------------------------------------------------------------------------------------------------------------------------------------------------------------------------|--------------|----------|
|    | (Phenolic)                            | <i>officinalis</i> , F: <i>Magnoliaceae</i>       | activation of nuclear factor erythroid 2-related factor 2, via PI3K/Akt and protein kinase C signaling.                                                                                         | renal model  |          |
| 51 | Salvianolic acid B, (phenolic)        | <i>Salviae miltiorrhizae</i> , F: Lamiaceae       | Ref to text.                                                                                                                                                                                    |              | [57]     |
| 52 | 4-OH-benzyl alcohol (Phenolic)        | <i>Gastrodia elata</i> , F: Orchidaceae           | Antagonize cerebral ischemia by increasing Bcl-2 expression, inhibiting caspase-3 activity and modulating cytoprotective genes (Nrf2, PDI, and neurotrophic factors).                           | MCAO         | [58]     |
| 53 | Theaflavin (Phenolic)                 | <i>Camellia sinensis</i> (black tea), F: Theaceae | Neuroprotective and Anti-inflammatory against cerebral IRI via reducing expression of STAT-1 (inflammation-related genes such as ICAM-1, VCAM-1, E-selectin, IL-6, IL-8, and cyclooxygenase-2 ) | MCAO         | [48]     |
| 54 | 4'-geranyloxyferulic acid. (Phenolic) | <i>Acronychia baueri</i> , F: Rutaceae            | Anti-inflammatory agents used to treat cerebral IRI via regulation of PPAR $\gamma$ and NF- $\kappa$ B pathway.                                                                                 | MCAO         | [49, 50] |
| 55 | Hydroxysafflor yellowA (Phenolic)     | <i>Carthamus tinctorium</i> , F: Asteraceae       | Anti-inflammatory against cerebral IRI by suppressing p38 phosphorylation and NF-B signaling .                                                                                                  | OGD          | [75]     |
| 56 | Schizandrin A (Phenolic)              | <i>Schisandra chinensis</i> , F: Schisandraceae   | Anti-oxidant and neuroprotective against Cerebral IRI via regulating the AMPK/Nrf2 pathway and suppressing inflammation and oxidative stress.                                                   | MCAO         | [109]    |
| 57 | Forsythiaside A (Phenolic)            | <i>Forsythia suspensa</i> , F: Oleaceae           | Anti-apoptotic and anti-inflammatory against cerebral IRI via mediation of the activation of Nrf2 and ER stress pathways.                                                                       | MCAO         | [111]    |
| 58 | Trilobatin (Phenolic)                 | <i>Lithocarpus polystachyus</i> , F: Fagaceae     | protective, antioxidant and anti-inflammatory in astrocytes and cortical neurons in cerebral IRI via upregulation of nuclear                                                                    | MCAO and OGD | [74]     |

|    |                               |                                                  |                                                                                                                                                                                                        |                                        |           |
|----|-------------------------------|--------------------------------------------------|--------------------------------------------------------------------------------------------------------------------------------------------------------------------------------------------------------|----------------------------------------|-----------|
|    |                               |                                                  | Nrf2, NQO1, and HO-1 expression, increasing Sirt3 expression and the reduction of Keap1.                                                                                                               |                                        |           |
| 59 | Ferulic acid (Phenolic)       | <i>Ligusticum chuanxiong</i> , F: Apiaceae       | - anti-apoptotic against cerebral IRI via regulation of Bax/cytochrome c/Smac/DIABLO/XIAP/ caspase-3- (or Bax/AIF-) and Beclin-1/LC3A/B-II/Atg5-mediated signaling, respectively, in penumbral cortex. | pMCAO                                  | [118]     |
| 60 | Lithospermic acid (Phenolic)  | <i>O. forskoleoi</i> , F: Lamiaceae              | Anti-oxidant and Protective against mesenteric IRI by decreasing oxidative stress (increasing tissue SOD and GPx activities and decreasing MDA and MPO levels).                                        | Intestinal ischemia                    | [92, 132] |
| 61 | Epicatechin (Flavonoid)       | Black tea <i>Camellia sinensis</i> , F: Theaceae | Neuroprotective against cerebral IRI through activation of Nrf2 and an increase in the neuroprotective HO1 enzyme.                                                                                     | pdMCAO                                 | [79]      |
| 62 | Isoliquiritigenin (Flavonoid) | <i>Glycyrrhiza glabra</i> , F: Fabaceae          | - protective against cerebral IRI due to the amelioration of cerebral energy metabolism and its antioxidant property and protecting brain Na <sup>+</sup> K <sup>+</sup> ATPase activity.              | MCAO                                   | [64]      |
| 63 | Gardenin (Flavonoid)          | <i>Ocimum forskolei</i> , F: Lamiaceae           | Protective against focal cerebral IRI via regulatory effect on the gene expression.                                                                                                                    | LCAO                                   | [66]      |
| 64 | Scutellarin (Flavonoid)       | <i>Erigeron breviscapus</i> , F: Asteraceae      | Anti-oxidant and Protective against cerebral IRI via augmentation of cellular antioxidant defense capacity.                                                                                            | MCAO                                   | [67]      |
| 65 | Icaritin (Flavonoid)          | <i>Epimedium grandiflorum</i> , F: Berberidaceae | Anti-apoptotic and neuroprotective against cerebral IRI in SH-SY5Y cells via regulation of Nrf2/Keap1 signaling pathway.                                                                               | H <sub>2</sub> O <sub>2</sub> -induced | [70]      |
| 66 | Nobiletin (Flavonoid)         | <i>Citrus nobilis</i> , F: Rutaceae              | Anti-apoptotic and anti-inflammatory against cerebral                                                                                                                                                  | pMCAO                                  | [81]      |



|    |                                                                         |                                                      |                                                                                                                                                                                                                   |                                                          |       |
|----|-------------------------------------------------------------------------|------------------------------------------------------|-------------------------------------------------------------------------------------------------------------------------------------------------------------------------------------------------------------------|----------------------------------------------------------|-------|
|    |                                                                         |                                                      | IRI via modulating the MAPK signaling pathway (upregulating Bcl-2 and downregulating Bax, caspase3, p-p38 and MAPKAP-2.                                                                                           |                                                          |       |
| 67 | Apigenin-7-O- $\beta$ -D-(-6''-p-coumaroyl)-glucopyranoside (Flavonoid) | <i>Clematis tangutica</i> , F: Ranunculaceae         | Anti-apoptotic and cardioprotective against myocardial IRI Via activating PKC $\epsilon$ (reduces mitochondrial oxidative stress and promotes Nrf2/HO-1-mediated anti-apoptosis signaling).                       | ligation of the left anterior descending coronary artery | [106] |
| 68 | Myricetin (Flavonoid)                                                   | <i>Tomatoes Solanum lycopersicum</i> , F: Solanaceae | Neuroprotection against cerebral IRI via decreasing reactive oxygen species.                                                                                                                                      | MCAO                                                     | [90]  |
| 69 | Silibinin-C-2',3-bis hydrogensuccinat (Flavonoid)                       | Milk thistle <i>Silybum marianum</i> , F: Asteraceae | Anti-oxidant and protective against skeletal muscle IRI via reduction of reactive oxygen species (prevent ROS lipid peroxidation).                                                                                | -                                                        | [41]  |
| 70 | Butein (Flavonoid)                                                      | <i>Rhus verniciflua</i> (Cashew), F: Anacardiaceae   | Protective against renal IRI via activating sirt1 .                                                                                                                                                               | Open and close of peritoneum                             | [48]  |
| 71 | Wogonin (Flavonoid)                                                     | <i>Scutellaria baicalensis</i> , <b>F: Lamiaceae</b> | Anti-inflammatory, attenuated the death of hippocampal neurons by transient global ischemia via suppression of NF $\kappa$ B activity (diminishing LPS-induced TNF- $\alpha$ , IL-1 $\beta$ , and NO production). | OGD                                                      | [44]  |
| 72 | Isoquercetin (Flavonoid)                                                | <i>Mangifera indica</i> , F: Anacardiaceae           | Antioxidant, anti-apoptotic and protective against cerebral IRI via inducing the translocation of Nrf2 into the nucleus, and inhibiting NOX4/ROS/NF-B pathway.                                                    | MCAO OGD                                                 | [99]  |
| 73 | 6''-O-succinylapigenin (Flavonoid)                                      | <i>Matricaria chamomilla</i> , F: Asteraceae         | Active against cerebral IRI via activating the ERK/Nrf2/HO-1 pathway.                                                                                                                                             | MCAO                                                     | [101] |
| 74 | Luteoloside (Flavonoid)                                                 | <i>Cynara scolymus</i> , F: Asteraceae               | Antineuro-inflammatory against focal cerebral IRI via inhibiting NF- $\kappa$ B signaling                                                                                                                         | MCAO                                                     | [102] |

|    |                                      |                                                      |                                                                                                                                                                                                                                                                                      |                                   |       |
|----|--------------------------------------|------------------------------------------------------|--------------------------------------------------------------------------------------------------------------------------------------------------------------------------------------------------------------------------------------------------------------------------------------|-----------------------------------|-------|
|    |                                      |                                                      | pathway.                                                                                                                                                                                                                                                                             |                                   |       |
| 75 | Biochanin A<br>(Flavonoid)           | Glycine max, F:<br>Fabaceae                          | Protective against myocardia<br>IRI through blocking<br>TLR4/NF-kB/NLRP3 signaling<br>pathway.                                                                                                                                                                                       | transient<br>coronary<br>ligation | [96]  |
| 76 | Xanthohumol<br>(Flavonoid)           | <i>Humulus<br/>lupulus</i> , F:<br>Cannabaceae       | Anti-apoptotic, anti-oxidant<br>and anti-inflammatory against<br>cerebral IRI via the inhibition<br>of phosphorylation of p38-<br>MAPK and the mediation of<br>nuclear Nrf2 activation.                                                                                              | MCAO and<br>OGD                   | [97]  |
| 77 | Galuteolin<br>(Flavonoid)            | <i>Lonicera<br/>Japonica</i> , F:<br>Caprifoliaceae  | Neuroprotective against<br>cerebral IRI-through the down-<br>regulation of autophagy-related<br>indicators in I/R<br>Anti-apoptotic, anti-oxidant<br>and anti-inflammatory (reduced<br>pro-inflammatory factors IL-1 $\beta$<br>and TNF- $\alpha$ and inhibited<br>VEGF expression). | MCAO/R                            | [103] |
| 78 | Isoquercetin<br>(Flavonoid)          | <i>Mangifera<br/>indica</i> , F:<br>Anacardiaceae    | - antioxidant, anti-apoptotic<br>and protective against cerebral<br>IRI via inducing the<br>translocation of Nrf2 into the<br>nucleus, and inhibiting<br>NOX4/ROS/NF-B pathway.                                                                                                      | MCAO<br>OGD                       | [99]  |
| 79 | Baicalein<br>(Flavonoid)             | <i>Scutellaria<br/>baicalensis</i> , F:<br>Lamiaceae | protective against cerebral IRI<br>by inhibition of 12/15-<br>lipoygenase pathway.                                                                                                                                                                                                   | tMCAO                             | [1]   |
| 80 | Baicalin<br>(Flavonoid)              | <i>Scutellaria<br/>baicalensis</i> , F:<br>Lamiaceae | protect against cerebral IRI via<br>inhibiting TLR2/4 signaling<br>pathway and reducing the<br>expression of TLR2/4, NF $\kappa$ B,<br>COX-2 and iNOS (Li <i>et al.</i> ,<br>2017).                                                                                                  | pMCAO                             | [19]  |
| 81 | Xanthohumol<br>(Chalcone, flavonoid) | <i>Humulus<br/>lupulus</i> , F:<br>Cannabaceae       | Protective against renal IRI via<br>ROS scavenging and an anti-<br>inflammatory effect mediated<br>by the inhibition of the JAK-<br>2/STAT-3 pathway.                                                                                                                                | MCAO                              | [35]  |
| 82 | Naringenin<br>(Flavonoid)            | <i>Ocimum<br/>sanctum</i> , F:<br>Lamiaceae          | Neuroprotective against<br>cerebral IRI by suppressing<br>NF- $\kappa$ B-mediated                                                                                                                                                                                                    | tMCAO                             | [36]  |

|    |                                                    |                                                 |                                                                                                                                                                                                                              |                       |       |
|----|----------------------------------------------------|-------------------------------------------------|------------------------------------------------------------------------------------------------------------------------------------------------------------------------------------------------------------------------------|-----------------------|-------|
|    |                                                    |                                                 | neuroinflammation.                                                                                                                                                                                                           |                       |       |
| 83 | Puerarin<br>(Flavonoid)                            | <i>Pueria Radix</i> , F:<br>Fabaceae            | Neuroprotection against cerebral IRI associated with erythropoietin (EPO) elevated expression and decreased COX-2 level.                                                                                                     | MCAO<br>OGD           | [19]  |
| 84 | Calycosin<br>(Favonoid)                            | <i>Astragalus membranaceu</i> ,<br>F: Fabaceae  | Neuroprotective against cerebral IRI via anti-autophagic, anti-apoptotic and anti-inflammatory actions (upregulated the expression of p62, NBR1 and Bcl-2, and downregulated the level of TNF- $\alpha$ ).                   | Focal cerebral IRI    | [126] |
| 85 | Calycosin-7-o- $\beta$ -d-glucoside<br>(Flavonoid) | <i>Astragalus membranaceus</i> ,<br>F: Fabaceae | Anti-oxidant and anti-apoptotic against cerebral IRI via the SIRT1/FOXO1/PGC-1 $\alpha$ signaling pathway. (upregulated the expression of SIRT1, FOXO1, PGC-1 $\alpha$ , and Bcl-2 and downregulated the expression of Bax). | OGD/R                 | [127] |
| 86 | Lutein<br>(Flavonoid)                              | <i>Citrus limon</i> , F:<br>Rutaceae            | Protective against ovarian IRI by its antioxidative and anti-inflammatory activities.                                                                                                                                        | <b>Vascular clips</b> | [123] |
| 87 | Apigenin<br>(Flavonoid)                            | <i>Matricaria recutita</i> , F:<br>Asteraceae   | Anti-apoptotic and anti-oxidant for cerebral IRI via mitochondrial activation (improved MMP in PC12 cells with CoCl <sub>2</sub> -induced injury).                                                                           | MCAO                  | [131] |
| 88 | Breviscopine<br>(Flavone)                          | <i>Scutellaria barbata</i> , F:<br>Lamiaceae    | anti-apoptotic and neuroprotective against <b>cerebral</b> IRI via regulating the protein expression related to apoptosis (inhibited the expression caspase-3 and up-regulated the expression of bcl-2).                     | MCAO                  | [134] |
| 89 | Silibinin<br>(Flavonoid)                           | <i>Silybum marianum</i> , F:<br>asteraceae      | Ref to text.                                                                                                                                                                                                                 |                       | [137] |
| 90 | 5,7,3',4',5'-pentahydroxy                          | <i>Anogeissus Pendula</i> , F:                  | Anti-apoptotic and anti-oxidant against cerebral IRI via                                                                                                                                                                     | MCAO                  | [139] |

|     |                                                                            |                                                    |                                                                                                                                                     |        |              |
|-----|----------------------------------------------------------------------------|----------------------------------------------------|-----------------------------------------------------------------------------------------------------------------------------------------------------|--------|--------------|
|     | dihydroflavanol-3O-(2''-O-galloyl)- $\beta$ -D-glucopyranoside (Flavonoid) | Combretaceae                                       | reduced lipid peroxidation and inhibited cyclooxygenase activity.                                                                                   |        |              |
| 91  | Anthocyanin (Flavonoid)                                                    | <i>Lycium ruthenicum</i> , F: Solanaceae           | Anti-inflammatory and protective against cerebral IRI via regulation of Nuclear factor-kappa B (NF- $\kappa$ B) and the NLRP3 inflammasome pathway. | MCAO/R | [140]        |
| 92  | Genistein (Flavonoid)                                                      | <i>Ocimum sanctum</i> , F: Lamiaceae               | Neuroprotective in transient focal cerebral IRI via increasing endogenous antioxidant mechanisms and reducing oxidative stress.                     | MCAO   | [20]<br>[21] |
| 93  | Equol (4', 7 isoflavandiol) (flavonoid)                                    | <b>Soybean</b><br><i>Glycine max</i> , F: Fabaceae | Neuroprotection against focal cerebral IRI by inhibiting oxidative stress.                                                                          | MCAO   | [20]         |
| 94  | Luteolin (Flavonoid)                                                       | <i>Ixeris sonchifolia</i> , F: Asteraceae          | Neuroprotective against <i>ischemia-induced cerebral injury</i> via activation of Nrf-2.                                                            | MCAO   | [23]         |
| 95  | Polygalasaponin F (Saponin)                                                | <i>Polygala japonica</i> , F: Polygalaceae         | Anti-apoptotic and protective against cerebral IRI via activation of PI3K/Akt signalling                                                            | OGD/R- | [61]         |
| 96  | Ruscogenin (Saponin)                                                       | <i>Ophiopogon Japonicas</i> , F: Asparagaceae      | Neuroprotection against focal cerebral IRI via inhibition of NF- $\kappa$ B p65 expression and activation of NF- $\kappa$ B Signaling pathway .     | MCAO   | [29]         |
| 97  | Dioscin (Saponin)                                                          | <i>Dioscorea opposita</i> , F: Dioscoreaceae       | Inhibited cerebral IRI-induced inflammation through inhibition of the TLR4/MyD88/NF- $\kappa$ B.                                                    | MCAO   | [37]         |
| 98  | Diosgenin (Saponin)                                                        | <i>Dioscorea rhizome</i> , F: Dioscoreaceae        | Neuroprotective against cerebral IRI .                                                                                                              | (MCAO) | [46]         |
| 99  | Glycyrrhizin (Saponin)                                                     | <i>Glycyrrhiza glabra</i> , F: Fabaceae            | NeuroProtective against cerebral IRI via inhibiting HMGB1 and IL-17A .                                                                              | MCAO   | [77]         |
| 100 | S-allyl cysteine (Sulphur containing                                       | Garlic<br><i>Allium sativum</i> ,                  | Cytoprotective of astrocytes in cerebral IRI via increasing in                                                                                      | MCAO   | [83]         |

|     |                                                          |                                                              |                                                                                                                                                                         |                                         |       |
|-----|----------------------------------------------------------|--------------------------------------------------------------|-------------------------------------------------------------------------------------------------------------------------------------------------------------------------|-----------------------------------------|-------|
|     | compound)                                                | F:<br>Amaryllidaceae                                         | Nrf2 and its targets and decreased phosphorylated JNK and p38 levels.                                                                                                   |                                         |       |
| 101 | (DATs) di-allyl trisulfide (Sulphur containing compound) | Garlic<br><i>Allium sativum</i> ,<br>F:<br>Amaryllidaceae    | Protective against Cerebral IRI Via Nrf2 induction (reduced MMP9 levels, MDA levels).                                                                                   | MCAO                                    | [84]  |
| 102 | 3H-1,2-dithiole-3- (Sulphur containing compound)         | Broccoli<br><i>Brassica oleracea</i> ,<br>F:<br>Brassicaceae | Neuroprotective from cerebral IRI via inducing Nrf2 expression in the brain which suppresses microglia activation.                                                      | tMCAO                                   | [94]  |
| 103 | Sulforaphane (Sulphur containing compound)               | Broccoli<br><i>Brassica oleracea</i> ,<br>F:<br>Brassicaceae | Anti-oxidant and protective against Intestinal and liver IRI through Nrf2-ARE pathway (increased level of liver Nrf2 and HO-1 expression).                              | clamping the superior mesenteric artery | [95]  |
| 104 | Lipoic acid (Sulphur containing compound)                | Peas<br><i>Pisum sativum</i> ,<br>F: Fabaceae                | Anti-oxidant and protective against cerebral IRI through activation of the BDNF-PI3K/Akt-ERK1/2 pathway.                                                                | MCAO                                    | [98]  |
| 105 | Allicin (Sulphur containing compound)                    | <i>Allium sativa</i> L.,<br>F:<br>Amaryllidaceae             | Anti-apoptotic and neuroprotective against cerebral IRI via increasing the activities of (CAT, SOD, GPX, GST) and promoting the angiogenesis in the peri-infarct zone . | MCAO                                    | [133] |
| 106 | Guattegaumerine (Alkaloid)                               | <i>Guatteria gaumeri</i> , F:<br>Annonaceae                  | protective against cerebral IRI via anti-oxidant anti-inflammatory and anti-apoptotic.                                                                                  | H2O2                                    | [53]  |
| 107 | Spiramin T (Alkaloid)                                    | <i>Spiraea japonica</i> var. <i>acuta</i> , F:<br>Rosaceae   | NeuroProtective against global cerebral IRI. Via modulation of endogenous antioxidant enzymes and reduction of calcium accumulation.                                    | MCAO                                    | [40]  |
| 108 | Huperzine A (Alkaloid)                                   | <i>Huperzia serrata</i> , F:<br>Lycopodiaceae                | Neuroprotective and anti-inflammatory against focal cerebral IRI via inhibition of NF-κB translocation and                                                              | MCAO                                    | [31]  |

|     |                           |                                                      |                                                                                                                                                                |                                      |             |
|-----|---------------------------|------------------------------------------------------|----------------------------------------------------------------------------------------------------------------------------------------------------------------|--------------------------------------|-------------|
|     |                           |                                                      | reduced iNOS and COX-2 expression in cortex and striatum.                                                                                                      |                                      |             |
| 109 | Sinomenine,<br>(alkaloid) | <i>Sinomenium<br/>Acutum</i> , F:<br>Menispermaceae  | Neuroprotective action on infarction size increased due to ischemia and recovered the neurological function.                                                   | cerebral<br>ischemia-<br>reperfusion | [32]        |
| 110 | Leonurine<br>(Alkaloid)   | <i>Leonotis<br/>leonurus</i> , F:<br>Lamiaceae       | Neuroprotective in cerebral IRI via Inhibition of mitochondrial ROS production (SOD↑; GPx↑; MDA↓).                                                             | MCAO                                 | [3]         |
| 111 | Neferine<br>(Alkaloid)    | <i>Nelumbo<br/>nucifera</i> , F:<br>Nelumbonaceae    | Neuroprotective against cerebral IRI via inducing autophagy and regulating the p62/Keap1/Nrf2 pathway which activated Nrf2/HO-1.                               | pMCAO                                | [115]       |
| 112 | Ephedrine<br>(Alkaloid)   | <i>Ephedra sinica</i> ,<br>F: Ephedraceae            | Anti-apoptotic and neuroprotective against cerebral IRI via reducing inflammatory responses, associating with decreasing the protein expression of p-NF-κB.    | MCAO                                 | [136]       |
| 113 | Swertiamarin<br>(Iridoid) | <i>Gentiana<br/>macrophylla</i> , F:<br>Gentianaceae | Anti-oxidant, anti-apoptotic and neuroprotective against cerebral IRI via -suppressing oxidative stress by activation of the Nrf2/ HO-1 pathway.               | MCAO                                 | [114]       |
| 114 | Cornel<br>(Iridoid)       | <i>Cornus<br/>officinalis</i> , F:<br>Cornaceae      | Promoted neurogenesis and angiogenesis and improved neurological function after cerebral ischemia via modulating CIG's increasing VEGF and Flk-1 in the brain. | MCAO                                 | [59]        |
| 115 | Cornin<br>(Iridoid)       | <i>Cornus florida</i> ,<br>F: Cornaceae              | Neuroprotective in cerebral IRI via Stabilization of mitochondrial function (SOD↑; GPx↑; MDA↓).                                                                | MCAO                                 | [4]         |
| 116 | Jasminoidin<br>(Iridoid)  | <i>Salvia<br/>miltiorrhiza</i> , F:<br>Lamiaceae     | Protective against focal cerebral IRI via, repressing the expression of tumor necrosis factor-alpha and interleukin 1 beta as well as                          | OGD/R                                | [38,<br>39] |

|     |                                    |                                               |                                                                                                                                                                                                    |                                                   |       |
|-----|------------------------------------|-----------------------------------------------|----------------------------------------------------------------------------------------------------------------------------------------------------------------------------------------------------|---------------------------------------------------|-------|
|     |                                    |                                               | vonWillebrand factor.                                                                                                                                                                              |                                                   |       |
| 117 | Beta carotene<br>(Carotenoid)      | <i>Daucus carota</i> ,<br>F: Apiaceae         | Protective against cerebral IRI via significantly enhancing the expression levels of genes (including apo E) related to cholesterol regulation and promoting neuronal repair after brain injuries. | MCAO                                              | [120] |
| 118 | b-cryptoxanthin<br>(Carotenoid)    | <i>Citrus reticulata</i> ,<br>F: Rutaceae     | Protective against myocardial IRI via -inhibiting NF-κB-mediated inflammatory signalling in rats (decreasing p-p38 MAPK levels).                                                                   | Left anterior descending coronary artery ligation | [121] |
| 119 | Zeaxanthin<br>(Carotenoid)         | <i>Lycium</i> Chinese berries, F: Solanaceae  | NeuroProtective against retinal IRI by increase in visual acuity due to optical reasons and enhance in the survival of RGC.                                                                        | cannulation                                       | [124] |
| 120 | Astaxanthin<br>(Carotenoid)        | <i>Nicotiana tabacum</i> , F: Solanaceae      | Protective against renal IRI via Anti-apoptotic, anti-oxidant and anti-inflammatory.                                                                                                               | Renal IRI                                         | [125] |
| 121 | Dihydrocapsaicin<br>(Carotenoid)   | <i>Capsicum annum</i> , F: solanaceae         | Anti-oxidant and Protective against focal cerebral IRI via increasing the expression of Nrf2 and NQO1 and decreasing NADPH oxidase (NOX2, NOX4), p65 subunit of NF-κB, and MMP9 levels.            | MCAO                                              | [85]  |
| 122 | Crocin<br>(Carotenoid)             | <i>Crocus sativus</i> ,<br>F: Iridaceae       | Ref to text.                                                                                                                                                                                       |                                                   | [42]  |
| 123 | Polysaccharides<br>(Miscellaneous) | <i>Momordica charantia</i> , F: Cucurbitaceae | Inhibition of intracerebral hemorrhage-induced brain injury via Inhibition of JNK3 signalling cascade.                                                                                             | OGD/R, MCAO                                       | [6]   |
| 124 | Ginkgolide B<br>(Miscellaneous)    | <i>Ginco biloba</i> , F: Ginkgoaceae          | Protective and anti-apoptotic against cerebral IRI via modulation of the PI3K signalling pathway.                                                                                                  | OGD                                               | [65]  |
| 125 | Oleuropein<br>(Miscellaneous)      | <i>Olea europaea</i> , F: Oleaceae            | neuroprotective against cerebral IRI via a reduction in anti-apoptotic markers                                                                                                                     | MCAO                                              | [10]  |
| 126 | Embelin                            | <i>Embelia ribes</i> , F:                     | Neuroprotective against                                                                                                                                                                            | BCCAO                                             | [12]  |

|                                                             |                                 |                                                  |                                                                                                                                                                                                                                                    |                                                          |       |
|-------------------------------------------------------------|---------------------------------|--------------------------------------------------|----------------------------------------------------------------------------------------------------------------------------------------------------------------------------------------------------------------------------------------------------|----------------------------------------------------------|-------|
|                                                             | (Miscellaneous)                 | Primulaceae                                      | transient cerebral IRI through a reduction of oxidative markers (GST↑; MDA↓; total thiol↑)                                                                                                                                                         |                                                          |       |
| 127                                                         | Phycocyanobilin (Miscellaneous) | <i>Spirulina platensis</i> , F: Microcoleaceae   | prevented the H <sub>2</sub> O <sub>2</sub> and glutamate-induced PC12 cell injury via a modulation of 19 genes mostly related to a detrimental pro-inflammatory environment and counteracted the oxidative imbalance in the treated BCCAO animals | pBCCAO                                                   | [13]  |
| 128                                                         | Hyperforin (Miscellaneous)      | <i>Hypericum perforatum</i> , F: Hypericaceae    | - protection against transient focal cerebral IRI via COX-1 and 5-lipoxygenase inhibition.                                                                                                                                                         | MCAO                                                     | [25]  |
| 129                                                         | Withaferin A (Miscellaneous)    | <i>Withania somnifera</i> , F: Solanaceae        | Prevents Myocardial IRI by Upregulating AMP-Activated Protein Kinase-Dependent B-Cell Lymphoma2 Signaling                                                                                                                                          | Reperfusion injury                                       | [69]  |
| 130                                                         | Carnosine (Miscellaneous)       | <i>Ginkgo biloba</i> , F: Ginkgoaceae            | Neuroprotective and anti-oxidotoxic in transient and permanent cerebral IRI via a reduction of reactive oxygen species                                                                                                                             | pMCAO, tMCAO                                             | [33]  |
| 131                                                         | Phycocyanobilin (Miscellaneous) | <i>Arthrospira platensis</i> , F: Microcoleaceae | Protective against PC12 cell injury in cerebral IRI via modulating 190 genes (93 up- and 97 down-regulated) associated to several immunological and inflammatory processes                                                                         | pBCCAO                                                   | [13]  |
| <b>II. Bioactives for management of myocardial ischemia</b> |                                 |                                                  |                                                                                                                                                                                                                                                    |                                                          |       |
| 132                                                         | Astragaloside (Terpenoid)       | <i>Astragalus membranaceus</i> , F: Leguminosae  | Cardioprotective against IRI via suppression of NF-κB, MMP-9, ICAM-1, and TNF-α in the parenchyma of brain                                                                                                                                         | MCAO                                                     | [30]  |
| 133                                                         | Protocatechualdehyde (Phenolic) | <i>Salvia miltiorrhiza</i> , F: Lamiaceae        | Anti-apoptotic and anti-inflammatory Against IRI in cultured neonatal rat cardiomyocytes-via inhibiting the NF-κB signaling pathway.                                                                                                               | ligation of the left anterior descending coronary artery | [105] |



|     |                                           |                                               |                                                                                                                                                                                                                                 |                                                   |       |
|-----|-------------------------------------------|-----------------------------------------------|---------------------------------------------------------------------------------------------------------------------------------------------------------------------------------------------------------------------------------|---------------------------------------------------|-------|
|     |                                           |                                               |                                                                                                                                                                                                                                 |                                                   |       |
| 134 | Cyanidin-3-O-D-glucopyranoside (Phenolic) | <i>Morus albus</i> , F: Moraceae              | Protective against myocardial IRI. suppressed the expressions of USP19, Beclin1, NCOA4, and LC3II/LC3I. relieved oxidative stress, downregulated LC3II/LC3I, TfR1 expression, and upregulated the expressions of FTH1 and GPX4. | OGD                                               | [68]  |
| 135 | Tetrandrine (Phenolic)                    | <i>Sephania tetrandra</i> , F: Menispermaceae | Protective against myocardial IRI through reducing the harmful cytokine TNF- $\alpha$ and IL-6, IL-1 $\beta$ .                                                                                                                  | Left anterior descending coronary artery ligation | [138] |
| 136 | Fisetin (Flavonoid)                       | <i>Salvia Rosmarinus</i> , F: Lamiaceae       | Protected against myocardial IRI via inhibiting expression of NF- $\kappa$ B, decreased the loss of MMP-9 and reduced nuclear translocation of NF- $\kappa$ B.                                                                  | HII                                               | [60]  |
| 137 | Palmatine, (Flavonoid)                    | <i>Coptis chinensis</i> , F: Ranunculaceae    | Protective against myocardial IRI via reducing oxidative stress and modulating inflammatory mediators.                                                                                                                          | HII                                               | [56]  |
| 138 | Isorhamnetin (Flavonoid)                  | <i>Ginkgo biloba</i> , F: Ginkgoaceae         | Anti-apoptotic and protective effect against myocardial IRI via the attenuation of apoptosis and oxidative stress (decreased expression of Bax and cleaved-caspase-3, increased expression of Bcl-2).                           | Langendorf f-perfused hearts.                     | [107] |
| 139 | Pinocembrin (Flavonoid)                   | <i>Pinus densiflora</i> , F: pinaceae         | Protective against myocardial IRI via direct stimulation of cardiac glycolysis through promoting the expression of the glycolytic enzyme, PFKFB3.                                                                               | Global IR                                         | [141] |
| 140 | Berberine (Alkaloid)                      | <i>Rhizoma coptidis</i>                       | Reduced myocardial apoptosis in myocardial I/R via activating AMPK and PI3K–Akt–eNOS signaling in diabetic rats.                                                                                                                | HII (hypoxia ischemic injury)                     | [55]  |
| 141 | Cyclobuxine (Alkaloid)                    | <i>Buxus microphylla</i> , F: Buxaceae        | Neuroprotective against myocardial IRI via inhibiting the release of ATP metabolites, and preventing the release of creatine phosphokinase during reperfusion.                                                                  |                                                   | [135] |

|                                                                                |                              |                                                |                                                                                                                                                                                                  |                                                     |       |
|--------------------------------------------------------------------------------|------------------------------|------------------------------------------------|--------------------------------------------------------------------------------------------------------------------------------------------------------------------------------------------------|-----------------------------------------------------|-------|
| 142                                                                            | Picroside II (Iridoid)       | <i>Picrorhiza kurroa</i> , F: Scrophulariaceae | Protective and anti-apoptotic against myocardial IRI via upregulating the phosphoinositide 3-kinase/Akt/endothelial NOS pathway (increase NO production and regulate Bcl-2 and Bax expressions). | Global ischemia                                     | [128] |
| 143                                                                            | Lycopene (Carotenoid)        | <i>Solanum lycopersicum</i> , F: Solanaceae    | Protective against myocardial IRI via inhibition of ROS accumulation and consequent inflammation in mice (suppressed JNK phosphorylation).                                                       | 1 Left anterior descending coronary artery ligation | [122] |
| <b>III. Bioactives for management of both cerebral and myocardial ischemia</b> |                              |                                                |                                                                                                                                                                                                  |                                                     |       |
| 144                                                                            | Thymoquinone (Phenolic)      | <i>Nigella sativa</i> , F: Ranunculaceae       | Ref to text.                                                                                                                                                                                     |                                                     | [62]  |
| 145                                                                            | Hesperetin (Flavanone)       | <i>Citrus genus</i> , F: Rutaceae              | Ref to text.                                                                                                                                                                                     |                                                     | [52]  |
| 146                                                                            | Quercetin (Flavonoid)        | <i>Citrus reticulatus</i> , F: Rutaceae        | Ref to text.                                                                                                                                                                                     |                                                     | [22]  |
| 147                                                                            | Ginsenoside Rb1 (Saponin)    | <i>Panax ginseng</i> , F: Araliaceae           | Ref to text.                                                                                                                                                                                     |                                                     | [26]  |
| 148                                                                            | Ginsenoside Rg3 (Saponin)    | <i>Panax ginseng</i> , F: Araliaceae           | Ref to text.                                                                                                                                                                                     |                                                     | [27]  |
| 149                                                                            | Ginsenoside Rh2 (Saponin)    | <i>Panax ginseng</i> , F: Araliaceae           | Ref to text.                                                                                                                                                                                     |                                                     | [27]  |
| 150                                                                            | Ginsenoside Rd (Saponin)     | <i>Panax ginseng</i> , F: Araliaceae           | Ref to text.                                                                                                                                                                                     |                                                     | [28]  |
| 151                                                                            | Notoginsenoside R1 (Saponin) | <i>Panax ginseng</i> , F: Araliaceae           | Ref to text.                                                                                                                                                                                     |                                                     | [104] |
| 152                                                                            | Ginsenoside Rg1 (Saponin)    | <i>Panax ginseng</i> , F: Araliaceae           | Ref to text.                                                                                                                                                                                     |                                                     | [71]  |
| 153                                                                            | Curcumin (Carotenoid)        | <i>Curcuma longa</i> , F: Zingiberaceae        | Ref to text.                                                                                                                                                                                     |                                                     | [19]  |

**Table S2.** All collected ischemia-related targets (407 targets) from literature and GeneBank database.

| Gene Symbol | Description                         |
|-------------|-------------------------------------|
| MTHFR       | Methylenetetrahydrofolate Reductase |
| F2          | Coagulation Factor II, Thrombin     |

|          |                                                                        |
|----------|------------------------------------------------------------------------|
| F5       | Coagulation Factor V                                                   |
| ACE      | Angiotensin I Converting Enzyme                                        |
| NOS3     | Nitric Oxide Synthase 3                                                |
| NOTCH3   | Notch Receptor 3                                                       |
| IL6      | Interleukin 6                                                          |
| GP1BA    | Glycoprotein Ib Platelet Subunit Alpha                                 |
| AGTR1    | Angiotensin II Receptor Type 1                                         |
| AGT      | Angiotensinogen                                                        |
| PON1     | Paraoxonase 1                                                          |
| ENG      | Endoglin                                                               |
| CST3     | Cystatin C                                                             |
| ALOX5AP  | Arachidonate 5-Lipoxygenase Activating Protein                         |
| NPPA     | Natriuretic Peptide A                                                  |
| MAPT     | Microtubule Associated Protein Tau                                     |
| CRP      | C-Reactive Protein                                                     |
| TNF      | Tumor Necrosis Factor                                                  |
| FBN1     | Fibrillin 1                                                            |
| GLA      | Galactosidase Alpha                                                    |
| TLR4     | Toll Like Receptor 4                                                   |
| LDLR     | Low Density Lipoprotein Receptor                                       |
| PRKCH    | Protein Kinase C Eta                                                   |
| MT-TL1   | Mitochondrially Encoded tRNA-Leu (UUA/G) 1                             |
| APOE     | Apolipoprotein E                                                       |
| ADAMTS13 | ADAM Metalloproteinase With Thrombospondin Type 1 Motif 13             |
| PON2     | Paraoxonase 2                                                          |
| TH       | Tyrosine Hydroxylase                                                   |
| EDNRA    | Endothelin Receptor Type A                                             |
| GNB3     | G Protein Subunit Beta 3                                               |
| VKORC1   | Vitamin K Epoxide Reductase Complex Subunit 1                          |
| PLAT     | Plasminogen Activator, Tissue Type                                     |
| PROZ     | Protein Z, Vitamin K Dependent Plasma Glycoprotein                     |
| PSEN1    | Presenilin 1                                                           |
| SELP     | Selectin P                                                             |
| EPOR     | Erythropoietin Receptor                                                |
| APP      | Amyloid Beta Precursor Protein                                         |
| COL4A1   | Collagen Type IV Alpha 1 Chain                                         |
| PTGIS    | Prostaglandin I2 Synthase                                              |
| TNFRSF1A | TNF Receptor Superfamily Member 1A                                     |
| SERPINE1 | Serpin Family E Member 1                                               |
| MMP9     | Matrix Metalloproteinase 9                                             |
| PIK3CA   | Phosphatidylinositol-4,5-Bisphosphate 3-Kinase Catalytic Subunit Alpha |
| VWF      | Von Willebrand Factor                                                  |
| NPPB     | Natriuretic Peptide B                                                  |
| SERPINC1 | Serpin Family C Member 1                                               |

|            |                                                                       |
|------------|-----------------------------------------------------------------------|
| HTRA1      | HtrA Serine Peptidase 1                                               |
| PDE4D      | Phosphodiesterase 4D                                                  |
| BDNF       | Brain Derived Neurotrophic Factor                                     |
| APOH       | Apolipoprotein H                                                      |
| IL10       | Interleukin 10                                                        |
| ACSL4      | Acyl-CoA Synthetase Long Chain Family Member 4                        |
| INS        | Insulin                                                               |
| TREX1      | Three Prime Repair Exonuclease 1                                      |
| JAK2       | Janus Kinase 2                                                        |
| TP53       | Tumor Protein P53                                                     |
| ELN        | Elastin                                                               |
| MT-ND4     | Mitochondrially Encoded NADH:Ubiquinone Oxidoreductase Core Subunit 4 |
| ACTA2      | Actin Alpha 2, Smooth Muscle                                          |
| VEGFA      | Vascular Endothelial Growth Factor A                                  |
| F3         | Coagulation Factor III, Tissue Factor                                 |
| LPA        | Lipoprotein(A)                                                        |
| APOB       | Apolipoprotein B                                                      |
| ADA2       | Adenosine Deaminase 2                                                 |
| ALB        | Albumin                                                               |
| CASP3      | Caspase 3                                                             |
| THBD       | Thrombomodulin                                                        |
| FGA        | Fibrinogen Alpha Chain                                                |
| PLA2G7     | Phospholipase A2 Group VII                                            |
| TGFB2      | Transforming Growth Factor Beta 2                                     |
| REN        | Renin                                                                 |
| SOD2       | Superoxide Dismutase 2                                                |
| F7         | Coagulation Factor VII                                                |
| ENO2       | Enolase 2                                                             |
| CXCL12     | C-X-C Motif Chemokine Ligand 12                                       |
| MYLK       | Myosin Light Chain Kinase                                             |
| TTR        | Transthyretin                                                         |
| HMGCR      | 3-Hydroxy-3-Methylglutaryl-CoA Reductase                              |
| TGFBR2     | Transforming Growth Factor Beta Receptor 2                            |
| IL1B       | Interleukin 1 Beta                                                    |
| CDKN2B-AS1 | CDKN2B Antisense RNA 1                                                |
| NOS2       | Nitric Oxide Synthase 2                                               |
| ACVRL1     | Activin A Receptor Like Type 1                                        |
| ADM        | Adrenomedullin                                                        |
| SOD1       | Superoxide Dismutase 1                                                |
| ALOX5      | Arachidonate 5-Lipoxygenase                                           |
| LMNA       | Lamin A/C                                                             |
| EDN1       | Endothelin 1                                                          |
| HSPA4      | Heat Shock Protein Family A (Hsp70) Member 4                          |

|          |                                                                          |
|----------|--------------------------------------------------------------------------|
| MYH11    | Myosin Heavy Chain 11                                                    |
| OLR1     | Oxidized Low Density Lipoprotein Receptor 1                              |
| PRKG1    | Protein Kinase CGMP-Dependent 1                                          |
| NOTCH1   | Notch Receptor 1                                                         |
| F10      | Coagulation Factor X                                                     |
| PF4      | Platelet Factor 4                                                        |
| SERPINA3 | Serpin Family A Member 3                                                 |
| PECAM1   | Platelet And Endothelial Cell Adhesion Molecule 1                        |
| COG2     | Component Of Oligomeric Golgi Complex 2                                  |
| ABCA1    | ATP Binding Cassette Subfamily A Member 1                                |
| F2R      | Coagulation Factor II Thrombin Receptor                                  |
| MT-TK    | Mitochondrially Encoded TRNA-Lys (AAA/G)                                 |
| ANGPT1   | Angiopoietin 1                                                           |
| CCL2     | C-C Motif Chemokine Ligand 2                                             |
| MAP2     | Microtubule Associated Protein 2                                         |
| ADORA1   | Adenosine A1 Receptor                                                    |
| AVP      | Arginine Vasopressin                                                     |
| PLG      | Plasminogen                                                              |
| LOX      | Lysyl Oxidase                                                            |
| ADRB2    | Adrenoceptor Beta 2                                                      |
| SH2B3    | SH2B Adaptor Protein 3                                                   |
| PPBP     | Pro-Platelet Basic Protein                                               |
| MT-ND1   | Mitochondrially Encoded NADH:Ubiquinone Oxidoreductase Core Subunit 1    |
| CREB1    | CAMP Responsive Element Binding Protein 1                                |
| RETN     | Resistin                                                                 |
| GUCY1A1  | Guanylate Cyclase 1 Soluble Subunit Alpha 1                              |
| MBP      | Myelin Basic Protein                                                     |
| P2RY12   | Purinergic Receptor P2Y12                                                |
| HMGB1    | High Mobility Group Box 1                                                |
| SELE     | Selectin E                                                               |
| ACE2     | Angiotensin I Converting Enzyme 2                                        |
| MB       | Myoglobin                                                                |
| SMAD3    | SMAD Family Member 3                                                     |
| PPARG    | Peroxisome Proliferator Activated Receptor Gamma                         |
| MIR126   | MicroRNA 126                                                             |
| SLC1A2   | Solute Carrier Family 1 Member 2                                         |
| AQP4     | Aquaporin 4                                                              |
| ADIPOQ   | Adiponectin, C1Q And Collagen Domain Containing                          |
| PROCR    | Protein C Receptor                                                       |
| PIK3C2A  | Phosphatidylinositol-4-Phosphate 3-Kinase Catalytic Subunit Type 2 Alpha |
| HTR2A    | 5-Hydroxytryptamine Receptor 2A                                          |
| CASP1    | Caspase 1                                                                |
| SELL     | Selectin L                                                               |

|          |                                                                       |
|----------|-----------------------------------------------------------------------|
| RNF213   | Ring Finger Protein 213                                               |
| ESR1     | Estrogen Receptor 1                                                   |
| AKT1     | AKT Serine/Threonine Kinase 1                                         |
| SULT1A3  | Sulfotransferase Family 1A Member 3                                   |
| SPP1     | Secreted Phosphoprotein 1                                             |
| CYCS     | Cytochrome C, Somatic                                                 |
| CNR1     | Cannabinoid Receptor 1                                                |
| MT-CYB   | Mitochondrially Encoded Cytochrome B                                  |
| MT-ND6   | Mitochondrially Encoded NADH:Ubiquinone Oxidoreductase Core Subunit 6 |
| EDNRB    | Endothelin Receptor Type B                                            |
| NES      | Nestin                                                                |
| MROS     | Melkersson-Rosenthal Syndrome                                         |
| ICAM1    | Intercellular Adhesion Molecule 1                                     |
| AIF1     | Allograft Inflammatory Factor 1                                       |
| MT-ND5   | Mitochondrially Encoded NADH:Ubiquinone Oxidoreductase Core Subunit 5 |
| KCNQ1    | Potassium Voltage-Gated Channel Subfamily Q Member 1                  |
| GDNF     | Glial Cell Derived Neurotrophic Factor                                |
| CXCR4    | C-X-C Motif Chemokine Receptor 4                                      |
| CD40LG   | CD40 Ligand                                                           |
| NGB      | Neuroglobin                                                           |
| GJA1     | Gap Junction Protein Alpha 1                                          |
| SERPIN1  | Serpin Family I Member 1                                              |
| GP6      | Glycoprotein VI Platelet                                              |
| MIR21    | MicroRNA 21                                                           |
| TBXA2R   | Thromboxane A2 Receptor                                               |
| HBA1     | Hemoglobin Subunit Alpha 1                                            |
| ANXA5    | Annexin A5                                                            |
| APOA1    | Apolipoprotein A1                                                     |
| COL4A2   | Collagen Type IV Alpha 2 Chain                                        |
| TSPO     | Translocator Protein                                                  |
| FABP3    | Fatty Acid Binding Protein 3                                          |
| SRC      | SRC Proto-Oncogene, Non-Receptor Tyrosine Kinase                      |
| MALAT1   | Metastasis Associated Lung Adenocarcinoma Transcript 1                |
| SLC6A4   | Solute Carrier Family 6 Member 4                                      |
| ADORA2A  | Adenosine A2a Receptor                                                |
| BMP7     | Bone Morphogenetic Protein 7                                          |
| SIRT1    | Sirtuin 1                                                             |
| AOC3     | Amine Oxidase Copper Containing 3                                     |
| GATA4    | GATA Binding Protein 4                                                |
| COL3A1   | Collagen Type III Alpha 1 Chain                                       |
| SERPINF2 | Serpin Family F Member 2                                              |
| APOC3    | Apolipoprotein C3                                                     |
| TNNT2    | Troponin T2, Cardiac Type                                             |

|           |                                                                     |
|-----------|---------------------------------------------------------------------|
| ATP1A2    | ATPase Na <sup>+</sup> /K <sup>+</sup> Transporting Subunit Alpha 2 |
| ITGB3     | Integrin Subunit Beta 3                                             |
| POMC      | Proopiomelanocortin                                                 |
| ENTPD1    | Ectonucleoside Triphosphate Diphosphohydrolase 1                    |
| AGTR2     | Angiotensin II Receptor Type 2                                      |
| MAPK3     | Mitogen-Activated Protein Kinase 3                                  |
| CALR      | Calreticulin                                                        |
| MT-CO1    | Mitochondrially Encoded Cytochrome C Oxidase I                      |
| IGF1      | Insulin Like Growth Factor 1                                        |
| TGFBR1    | Transforming Growth Factor Beta Receptor 1                          |
| FGB       | Fibrinogen Beta Chain                                               |
| PRNP      | Prion Protein                                                       |
| ARSA      | Arylsulfatase A                                                     |
| ADORA3    | Adenosine A3 Receptor                                               |
| POLG      | DNA Polymerase Gamma, Catalytic Subunit                             |
| DCX       | Doublecortin                                                        |
| CXCL8     | C-X-C Motif Chemokine Ligand 8                                      |
| BACE1     | Beta-Secretase 1                                                    |
| NFE2L2    | Nuclear Factor, Erythroid 2 Like 2                                  |
| TNFRSF12A | TNF Receptor Superfamily Member 12A                                 |
| PTGS2     | Prostaglandin-Endoperoxide Synthase 2                               |
| KNG1      | Kininogen 1                                                         |
| VCAM1     | Vascular Cell Adhesion Molecule 1                                   |
| CYP11B2   | Cytochrome P450 Family 11 Subfamily B Member 2                      |
| F9        | Coagulation Factor IX                                               |
| NR3C1     | Nuclear Receptor Subfamily 3 Group C Member 1                       |
| MIR15A    | MicroRNA 15a                                                        |
| JAG1      | Jagged Canonical Notch Ligand 1                                     |
| CYP2C9    | Cytochrome P450 Family 2 Subfamily C Member 9                       |
| MIAT      | Myocardial Infarction Associated Transcript                         |
| NTF3      | Neurotrophin 3                                                      |
| CASP9     | Caspase 9                                                           |
| GBA       | Glucosylceramidase Beta                                             |
| TGFB1     | Transforming Growth Factor Beta 1                                   |
| PPIG      | Peptidylprolyl Isomerase G                                          |
| SERPIND1  | Serpin Family D Member 1                                            |
| MPL       | MPL Proto-Oncogene, Thrombopoietin Receptor                         |
| EPO       | Erythropoietin                                                      |
| FLT1      | Fms Related Receptor Tyrosine Kinase 1                              |
| THPO      | Thrombopoietin                                                      |
| MMP3      | Matrix Metalloproteinase 3                                          |
| CCM2      | CCM2 Scaffold Protein                                               |
| MT-ATP6   | Mitochondrially Encoded ATP Synthase Membrane Subunit 6             |
| GSR       | Glutathione-Disulfide Reductase                                     |

|         |                                                                  |
|---------|------------------------------------------------------------------|
| LPL     | Lipoprotein Lipase                                               |
| RTN4    | Reticulon 4                                                      |
| ACTB    | Actin Beta                                                       |
| KIT     | KIT Proto-Oncogene, Receptor Tyrosine Kinase                     |
| CYP2C19 | Cytochrome P450 Family 2 Subfamily C Member 19                   |
| FGF2    | Fibroblast Growth Factor 2                                       |
| MIR155  | MicroRNA 155                                                     |
| TGFB3   | Transforming Growth Factor Beta 3                                |
| GHRL    | Ghrelin And Obestatin Prepropeptide                              |
| LIPC    | Lipase C, Hepatic Type                                           |
| IL4     | Interleukin 4                                                    |
| ADD1    | Adducin 1                                                        |
| RBFOX3  | RNA Binding Fox-1 Homolog 3                                      |
| MPO     | Myeloperoxidase                                                  |
| PDE5A   | Phosphodiesterase 5A                                             |
| SMAD4   | SMAD Family Member 4                                             |
| SLC2A10 | Solute Carrier Family 2 Member 10                                |
| TSPAN33 | Tetraspanin 33                                                   |
| F12     | Coagulation Factor XII                                           |
| MMP2    | Matrix Metalloproteinase 2                                       |
| GJA5    | Gap Junction Protein Alpha 5                                     |
| HSPA1A  | Heat Shock Protein Family A (Hsp70) Member 1A                    |
| LEP     | Leptin                                                           |
| HIF1A   | Hypoxia Inducible Factor 1 Subunit Alpha                         |
| PDE3A   | Phosphodiesterase 3A                                             |
| IL18    | Interleukin 18                                                   |
| TET2    | Tet Methylcytosine Dioxygenase 2                                 |
| ADRB3   | Adrenoceptor Beta 3                                              |
| MYBPC3  | Myosin Binding Protein C3                                        |
| GFAP    | Glial Fibrillary Acidic Protein                                  |
| ITGAM   | Integrin Subunit Alpha M                                         |
| DARS2   | Aspartyl-TRNA Synthetase 2, Mitochondrial                        |
| CP      | Ceruloplasmin                                                    |
| NOS1    | Nitric Oxide Synthase 1                                          |
| CALCA   | Calcitonin Related Polypeptide Alpha                             |
| F8      | Coagulation Factor VIII                                          |
| TTN     | Titin                                                            |
| TRPV4   | Transient Receptor Potential Cation Channel Subfamily V Member 4 |
| DRD4    | Dopamine Receptor D4                                             |
| CBS     | Cystathionine Beta-Synthase                                      |
| CETP    | Cholesteryl Ester Transfer Protein                               |
| AMPD1   | Adenosine Monophosphate Deaminase 1                              |
| MFAP5   | Microfibril Associated Protein 5                                 |
| CYP3A5  | Cytochrome P450 Family 3 Subfamily A Member 5                    |



|         |                                                                |
|---------|----------------------------------------------------------------|
| AGER    | Advanced Glycosylation End-Product Specific Receptor           |
| HSD11B2 | Hydroxysteroid 11-Beta Dehydrogenase 2                         |
| KCNA5   | Potassium Voltage-Gated Channel Subfamily A Member 5           |
| CAT     | Catalase                                                       |
| TNNI3   | Troponin I3, Cardiac Type                                      |
| MT-CO3  | Mitochondrially Encoded Cytochrome C Oxidase III               |
| IRS1    | Insulin Receptor Substrate 1                                   |
| ITGA2B  | Integrin Subunit Alpha 2b                                      |
| NGF     | Nerve Growth Factor                                            |
| NPY     | Neuropeptide Y                                                 |
| GATA6   | GATA Binding Protein 6                                         |
| MAT2A   | Methionine Adenosyltransferase 2A                              |
| FOXE3   | Forkhead Box E3                                                |
| CCR2    | C-C Motif Chemokine Receptor 2                                 |
| HMOX1   | Heme Oxygenase 1                                               |
| KCNJ5   | Potassium Inwardly Rectifying Channel Subfamily J Member 5     |
| MC4R    | Melanocortin 4 Receptor                                        |
| KRAS    | KRAS Proto-Oncogene, GTPase                                    |
| NEFL    | Neurofilament Light                                            |
| ALDH2   | Aldehyde Dehydrogenase 2 Family Member                         |
| ECE1    | Endothelin Converting Enzyme 1                                 |
| TIMP1   | TIMP Metalloproteinase Inhibitor 1                             |
| SCNN1A  | Sodium Channel Epithelial 1 Subunit Alpha                      |
| HP      | Haptoglobin                                                    |
| CSF3    | Colony Stimulating Factor 3                                    |
| ITGA2   | Integrin Subunit Alpha 2                                       |
| ACHE    | Acetylcholinesterase (Cartwright Blood Group)                  |
| MIR143  | MicroRNA 143                                                   |
| PTGS1   | Prostaglandin-Endoperoxide Synthase 1                          |
| TYR     | Tyrosinase                                                     |
| HBB     | Hemoglobin Subunit Beta                                        |
| CYP11B1 | Cytochrome P450 Family 11 Subfamily B Member 1                 |
| FLNA    | Filamin A                                                      |
| PCNT    | Pericentrin                                                    |
| ENPP1   | Ectonucleotide Pyrophosphatase/Phosphodiesterase 1             |
| PRKAG2  | Protein Kinase AMP-Activated Non-Catalytic Subunit Gamma 2     |
| SLC2A4  | Solute Carrier Family 2 Member 4                               |
| MIR146A | MicroRNA 146a                                                  |
| PKD1    | Polycystin 1, Transient Receptor Potential Channel Interacting |
| IAPP    | Islet Amyloid Polypeptide                                      |
| PROC    | Protein C, Inactivator Of Coagulation Factors Va And VIIIa     |
| IL17A   | Interleukin 17A                                                |
| KCNJ11  | Potassium Inwardly Rectifying Channel Subfamily J Member 11    |
| WFS1    | Wolframin ER Transmembrane Glycoprotein                        |

|           |                                                         |
|-----------|---------------------------------------------------------|
| MIR17     | MicroRNA 17                                             |
| CORIN     | Corin, Serine Peptidase                                 |
| PRL       | Prolactin                                               |
| INSR      | Insulin Receptor                                        |
| MIR145    | MicroRNA 145                                            |
| MIR208A   | MicroRNA 208a                                           |
| KDR       | Kinase Insert Domain Receptor                           |
| F13A1     | Coagulation Factor XIII A Chain                         |
| CX3CR1    | C-X3-C Motif Chemokine Receptor 1                       |
| CPS1      | Carbamoyl-Phosphate Synthase 1                          |
| TNFRSF11B | TNF Receptor Superfamily Member 11b                     |
| XDH       | Xanthine Dehydrogenase                                  |
| NCF1      | Neutrophil Cytosolic Factor 1                           |
| MYD88     | MYD88 Innate Immune Signal Transduction Adaptor         |
| GPT       | Glutamic--Pyruvic Transaminase                          |
| TLR2      | Toll Like Receptor 2                                    |
| GRIN2A    | Glutamate Ionotropic Receptor NMDA Type Subunit 2A      |
| NAGS      | N-Acetylglutamate Synthase                              |
| ADRB1     | Adrenoceptor Beta 1                                     |
| CDK5      | Cyclin Dependent Kinase 5                               |
| MIR132    | MicroRNA 132                                            |
| KLKB1     | Kallikrein B1                                           |
| MMP1      | Matrix Metalloproteinase 1                              |
| OTC       | Ornithine Carbamoyltransferase                          |
| IL2       | Interleukin 2                                           |
| BRCA2     | BRCA2 DNA Repair Associated                             |
| ATM       | ATM Serine/Threonine Kinase                             |
| MTR       | 5-Methyltetrahydrofolate-Homocysteine Methyltransferase |
| PLA2G2A   | Phospholipase A2 Group IIA                              |
| INF2      | Inverted Formin, FH2 And WH2 Domain Containing          |
| CELA2A    | Chymotrypsin Like Elastase 2A                           |
| DRD1      | Dopamine Receptor D1                                    |
| PPARA     | Peroxisome Proliferator Activated Receptor Alpha        |
| GNAS      | GNAS Complex Locus                                      |
| SON       | SON DNA Binding Protein                                 |
| FCGR2A    | Fc Fragment Of IgG Receptor IIA                         |
| CACNA1A   | Calcium Voltage-Gated Channel Subunit Alpha1 A          |
| EPHX2     | Epoxide Hydrolase 2                                     |
| MYMY1     | Moyamoya Disease 1                                      |
| MYMY3     | Moyamoya Disease 3                                      |
| CD14      | CD14 Molecule                                           |
| MEN1      | Menin 1                                                 |
| COMT      | Catechol-O-Methyltransferase                            |
| GCKR      | Glucokinase Regulator                                   |

|          |                                                                           |
|----------|---------------------------------------------------------------------------|
| CYBA     | Cytochrome B-245 Alpha Chain                                              |
| ITGB2    | Integrin Subunit Beta 2                                                   |
| LCN2     | Lipocalin 2                                                               |
| CCND1    | Cyclin D1                                                                 |
| HSPA5    | Heat Shock Protein Family A (Hsp70) Member 5                              |
| ATP1A3   | ATPase Na <sup>+</sup> /K <sup>+</sup> Transporting Subunit Alpha 3       |
| CCR5     | C-C Motif Chemokine Receptor 5 (Gene/Pseudogene)                          |
| ZMPSTE24 | Zinc Metallopeptidase STE24                                               |
| GGT1     | Gamma-Glutamyltransferase 1                                               |
| FOS      | Fos Proto-Oncogene, AP-1 Transcription Factor Subunit                     |
| IL1RN    | Interleukin 1 Receptor Antagonist                                         |
| PTPN1    | Protein Tyrosine Phosphatase Non-Receptor Type 1                          |
| SCN1A    | Sodium Voltage-Gated Channel Alpha Subunit 1                              |
| IRS2     | Insulin Receptor Substrate 2                                              |
| ACAN     | Aggrecan                                                                  |
| ELP1     | Elongator Complex Protein 1                                               |
| TNFSF4   | TNF Superfamily Member 4                                                  |
| STAT3    | Signal Transducer And Activator Of Transcription 3                        |
| S100B    | S100 Calcium Binding Protein B                                            |
| NLRP3    | NLR Family Pyrin Domain Containing 3                                      |
| GCGR     | Glucagon Receptor                                                         |
| COL4A5   | Collagen Type IV Alpha 5 Chain                                            |
| SCNN1B   | Sodium Channel Epithelial 1 Subunit Beta                                  |
| MT-CO2   | Mitochondrially Encoded Cytochrome C Oxidase II                           |
| BCL2L1   | BCL2 Like 1                                                               |
| CTF1     | Cardiotrophin 1                                                           |
| VDR      | Vitamin D Receptor                                                        |
| ERAP1    | Endoplasmic Reticulum Aminopeptidase 1                                    |
| ASS1     | Argininosuccinate Synthase 1                                              |
| TAC1     | Tachykinin Precursor 1                                                    |
| PVALB    | Parvalbumin                                                               |
| MTOR     | Mechanistic Target Of Rapamycin Kinase                                    |
| SCNN1G   | Sodium Channel Epithelial 1 Subunit Gamma                                 |
| HHT4     | Telangiectasia, Hereditary Hemorrhagic, Type 4                            |
| EGF      | Epidermal Growth Factor                                                   |
| IFNG     | Interferon Gamma                                                          |
| SCN8A    | Sodium Voltage-Gated Channel Alpha Subunit 8                              |
| ITPR1    | Inositol 1,4,5-Trisphosphate Receptor Type 1                              |
| NAMPT    | Nicotinamide Phosphoribosyltransferase                                    |
| PDGFRA   | Platelet Derived Growth Factor Receptor Alpha                             |
| KCNMB1   | Potassium Calcium-Activated Channel Subfamily M Regulatory Beta Subunit 1 |
| CYP4F2   | Cytochrome P450 Family 4 Subfamily F Member 2                             |
| CSF2     | Colony Stimulating Factor 2                                               |
| APOA5    | Apolipoprotein A5                                                         |

|        |                                                                    |
|--------|--------------------------------------------------------------------|
| SLC1A3 | Solute Carrier Family 1 Member 3                                   |
| BGN    | Biglycan                                                           |
| C3     | Complement C3                                                      |
| NPR3   | Natriuretic Peptide Receptor 3                                     |
| ADD3   | Adducin 3                                                          |
| DES    | Desmin                                                             |
| ATP1B1 | ATPase Na <sup>+</sup> /K <sup>+</sup> Transporting Subunit Beta 1 |
| PKD2   | Polycystin 2, Transient Receptor Potential Cation Channel          |
| CSTB   | Cystatin B                                                         |
| MIR33A | MicroRNA 33a                                                       |
| CYP3A4 | Cytochrome P450 Family 3 Subfamily A Member 4                      |
| DRD2   | Dopamine Receptor D2                                               |

**Table S3.** Ischemia-related targets that were predicted to be inhibited by the reviewed compounds. Interactions with blue-colored targets were validated by MDS and  $\Delta G_{\text{binding}}$  calculation.

| Compounds                | SwissPrediction | Inverse Docking      |                     |                     |                     |                    | Literature |       |       |        |       |        |      |      |       |  |
|--------------------------|-----------------|----------------------|---------------------|---------------------|---------------------|--------------------|------------|-------|-------|--------|-------|--------|------|------|-------|--|
| Epigallocatechin gallate | MAPT            | PIK3CA<br>(PDB:6GVF) | MAPK3<br>(PDB:2ZOQ) | MMP1<br>(PDB:3AYK)  | MMP2<br>(PDB:1HOV)  | JAK2<br>(PDB:3E64) | PIK3CA     |       |       |        |       |        |      |      |       |  |
| Hesperetin               |                 | PIK3CA<br>(PDB:6GVF) | NOS1<br>(PDB:4D1N)  | MAPK3<br>(PDB:2ZOQ) | JAK2<br>(PDB:3E64)  |                    |            |       |       |        |       |        |      |      |       |  |
| Apigenin                 | CDK5            | PIK3CA<br>(PDB:6GVF) | NOS1<br>(PDB:4D1N)  | XOR<br>(PDB:3B9J)   | MAPK3<br>(PDB:2ZOQ) | JAK2<br>(PDB:3E64) |            |       |       |        |       |        |      |      |       |  |
| Quercetin                |                 | PIK3CA<br>(PDB:6GVF) | NOS1<br>(PDB:4D1N)  | XOR<br>(PDB:3B9J)   | MAPK3<br>(PDB:2ZOQ) | JAK2<br>(PDB:3E64) | NOS1       | XOR   |       |        |       |        |      |      |       |  |
| Hesperidin               |                 |                      |                     |                     |                     |                    | PIK3CA     |       |       |        |       |        |      |      |       |  |
| Resveratrol              |                 | PIK3CA<br>(PDB:6GVF) | MAPK3<br>(PDB:2ZOQ) | JAK2<br>(PDB:3E64)  |                     |                    | MPO        | TLR4  | TNF   | MMP9   | HMGB1 |        |      |      |       |  |
| Silibinin                |                 | MAPK3<br>(PDB:2ZOQ)  |                     |                     |                     |                    | TNF        | SOD   |       |        |       |        |      |      |       |  |
| (Z)-Ligustilide          |                 |                      |                     |                     |                     |                    | SOD        | HSPA5 | MMP2  | MMP9   |       |        |      |      |       |  |
| Thymoquinone             |                 |                      |                     |                     |                     |                    | XOR        |       |       |        |       |        |      |      |       |  |
| Tanshinone IIA           |                 | HMGR<br>(PDB:3CCZ)   |                     |                     |                     |                    | MPO        | TNF   | IL1B  | IL6    | NOS1  | MAPK3  | IL10 | TLR4 | TGFB2 |  |
| Salvianolic acid A       |                 | SQLE<br>(PDB:6C6N)   |                     |                     |                     |                    | MMP9       | GPX1  | TNF   | IL1B   | IL6   |        |      |      |       |  |
| Salvianolic acid B       |                 |                      |                     |                     |                     |                    | TNF        | IL1B  | SIRT1 | TLR4   | MAPK3 | PIK3CA |      |      |       |  |
| Curcumin                 |                 |                      |                     |                     |                     |                    | XOR        | SOD   | NOS1  | HSPA5  | TLR4  | MAPK3  |      |      |       |  |
| Crocin                   |                 |                      |                     |                     |                     |                    | PIK3CA     | SOD   | GPX1  | MAPK3  | NOX1  | HMGB1  |      |      |       |  |
| Picroside II             |                 |                      |                     |                     |                     |                    | TLR4       | GPX1  | SOD   | XOR    | NOX1  | MPO    |      |      |       |  |
| Glycyrrhizin             |                 |                      |                     |                     |                     |                    | TNF        | IL1B  | IL6   |        |       |        |      |      |       |  |
| Ginsenoside rb1          |                 |                      |                     |                     |                     |                    | MMP9       | NOS1  | NOX1  | PIK3CA | SOD   |        |      |      |       |  |
| Ginsenoside Rd           |                 |                      |                     |                     |                     |                    | PIK3CA     | MMP9  |       |        |       |        |      |      |       |  |
| Ginsenoside RG1          |                 |                      |                     |                     |                     |                    | MAPK3      | HMGB1 | TLR4  | RhoA   | MPO   | SOD    | CAT  |      |       |  |
| Notoginsenoside R1       |                 |                      |                     |                     |                     |                    | PIK3CA     | IL6   | TNF   |        |       |        |      |      |       |  |

**Table S4.** KEGG signaling pathway enrichment

| Description                         | Number of genes | FDR value | Genes                                                                           |
|-------------------------------------|-----------------|-----------|---------------------------------------------------------------------------------|
| Blood circulation                   | 14              | 3.34E-07  | PIK3C2A GJA1 MAPK3 OLR1 LEP F2R LPA SERPINF2 ADORA2A ADRB3 PDE4D MTOR ADRB1 SOD |
| Cardiovascular system disease       | 10              | 1.10E-05  | MAPT PIK3C2A IL10 TGFB2 IL6 GPX1 IL1B XOR MPO SOD                               |
| Vascular disease                    | 9               | 1.92E-04  | TGFB2 XOR MPO PIK3C2A MAPK3 FLT1 S100B LPA MYLK                                 |
| Regulation of blood vessel diameter | 7               | 1.59E-06  | PIK3C2A GPX1 XOR SOD NTF3 MYD88 TRPV4                                           |
| Aging                               | 7               | 3.11E-03  | NOX1 MPO SOD PRNP BRCA2 NFE2L2 SOD2                                             |
| Artery disease                      | 7               | 9.20E-03  | MPO IL1B IL6 TGFB2 IL10 ITGA2B LPA                                              |
| Regulation of blood pressure        | 7               | 8.35E-03  | ADRB3 PDE4D ADRB1 SOD GJA1 PPARG LEP                                            |
| Cholesterol metabolism              | 3               | 1.46E-02  | SQLE HMGCR MAPK3                                                                |

**Table S5: Calculated pharmacokinetics and bioavailability properties of the reviewed compounds**

| No.                                                      | Compound                                            | GIT Absorption | BBB Permeability | Bioavailability score | Lipinski |
|----------------------------------------------------------|-----------------------------------------------------|----------------|------------------|-----------------------|----------|
| <b>I. Bioactives for management of cerebral ischemia</b> |                                                     |                |                  |                       |          |
| 1                                                        | Totarol (Terpenoid)                                 | High           | Yes              | 0.55                  | Yes      |
| 2                                                        | Taraxasterol (Terpenoid)                            | High           | Yes              | 0.55                  | Yes      |
| 4                                                        | Resveratrol (Terpenoid)                             | High           | Yes              | 0.55                  | Yes      |
| 5                                                        | Celastrol (Terpenoid)                               | High           | Yes              | 0.55                  | No       |
| 6                                                        | Asiatic acid (Terpenoid)                            | High           | Yes              | 0.55                  | Yes      |
| 7                                                        | 11-Keto- $\beta$ -boswellic acid terpenoid          | High           | Yes              | 0.55                  | Yes      |
| 8                                                        | Acetyl-11-Keto- $\beta$ -boswellic acid (Terpenoid) | High           | Yes              | 0.55                  | Yes      |
| 9                                                        | Andrographolide (Terpenoid)                         | High           | Yes              | 0.55                  | Yes      |
| 10                                                       | Parthenolide (Terpenoid)                            | High           | Yes              | 0.55                  | No       |
| 11                                                       | Ursolic acid (Terpenoid)                            | High           | Yes              | 0.55                  | Yes      |
| 12                                                       | Bilobalide (Terpenoid)                              | High           | Yes              | 0.55                  | Yes      |
| 13                                                       | Nomilin (Terpenoid)                                 | High           | Yes              | 0.55                  | No       |
| 14                                                       | Paeoniflorin (Terpenoid)                            | Low            | Yes              | 0.55                  | No       |
| 15                                                       | Carnosic acid (Terpenoid)                           | Low            | Yes              | 0.55                  | No       |
| 16                                                       | Linalool terpenoid                                  | High           | Yes              | 0.55                  | Yes      |
| 17                                                       | Senkyunolide I (Terpene)                            | Low            | Yes              | 0.55                  | No       |
| 18                                                       | Tanshinone A                                        | High           | Yes              | 0.55                  | Yes      |

|    |                                                                                    |      |     |      |     |
|----|------------------------------------------------------------------------------------|------|-----|------|-----|
|    | (Terpenoid)                                                                        |      |     |      |     |
| 19 | Ligustrazine<br>(Terpenoid)                                                        | High | Yes | 0.55 | Yes |
| 20 | Z-ligustilide<br>(Terpenoid)                                                       | High | Yes | 0.55 | Yes |
| 21 | Triptolide<br>(Terpenoid)                                                          | High | Yes | 0.55 | Yes |
| 22 | Safranal<br>(Terpenoid)                                                            | High | Yes | 0.55 | Yes |
| 23 | Britanin<br>(Terpenoid)                                                            | High | Yes | 0.55 | Yes |
| 24 | Ginkgolide K<br>(Terpenoid)                                                        | Low  | No  | 0.55 | No  |
| 25 | <b>Salvianolic acid A</b><br>(Phenolic)                                            | Low  | No  | 0.55 | No  |
| 26 | Emodin<br>(Phenolic)                                                               | High | Yes | 0.55 | Yes |
| 27 | Magnesium<br>lithospermate B<br>(Phenolic)                                         | Low  | No  | 0.55 | No  |
| 28 | 2,3,5,4'-Tetra<br>hydroxystilbene-<br>2-O - $\beta$ -D-<br>glucoside<br>(Phenolic) | High | Yes | 0.55 | Yes |
| 29 | Paconol<br>(Phenolic)                                                              | High | Yes | 0.55 | Yes |
| 30 | Osthole<br>(Phenolic)                                                              | High | Yes | 0.55 | Yes |
| 31 | Tetrahydroxystil<br>bene<br>(Phenolic)                                             | High | Yes | 0.55 | Yes |
| 32 | Cinnamophilin<br>neolignane<br>(Phenolic)                                          | High | Yes | 0.55 | Yes |
| 33 | Cinnamophilin<br>(phenolic)                                                        | High | Yes | 0.55 | Yes |
| 34 | Schisandrin B<br>(Phenolic)                                                        | High | Yes | 0.55 | Yes |



|    |                                     |      |     |      |     |
|----|-------------------------------------|------|-----|------|-----|
|    |                                     |      |     |      |     |
| 35 | Epigallocatechin gallate (Phenolic) | High | Yes | 0.55 | Yes |
| 36 | Shikonin (Phenolic)                 | High | Yes | 0.55 | Yes |
| 37 | Paeonol (Phenolic)                  | High | Yes | 0.55 | Yes |
| 38 | Curculigoside A (Phenolic)          | High | Yes | 0.55 | Yes |
| 39 | Theaflavin (Phenolic)               | High | Yes | 0.55 | Yes |
| 40 | Salidroside (Phenolic)              | High | Yes | 0.55 | Yes |
| 41 | Gastrodin (Phenolic)                | High | Yes | 0.55 | Yes |
| 42 | Rosmarinic acid (Phenolic)          | Low  | No  | 0.55 | No  |
| 43 | Lyciumamide A (Phenolic)            | High | Yes | 0.55 | Yes |
| 44 | Mangiferin Xanthone, (Phenolic)     | High | Yes | 0.55 | Yes |
| 45 | Procyanidin B2 (Phenolic)           | High | Yes | 0.55 | Yes |
| 46 | Chlorogenic acid (Phenolic)         | Low  | No  | 0.55 | No  |
| 47 | Corilagin (Phenolic)                | High | Yes | 0.55 | Yes |
| 48 | Alpha tocopherol (Phenolic)         | High | Yes | 0.55 | Yes |
| 49 | Gallic acid (Phenolic)              | Low  | No  | 0.55 | No  |
| 50 | Honokiol (Phenolic)                 | High | Yes | 0.55 | Yes |
| 51 | Salvianolic acid B, (phenolic)      | High | Yes | 0.55 | Yes |
| 52 | 4-OH-benzyl alcohol (Phenolic)      | High | Yes | 0.55 | Yes |
| 53 | Theaflavin                          | Low  | No  | 0.55 | No  |

|    |                                                                           |      |     |      |     |
|----|---------------------------------------------------------------------------|------|-----|------|-----|
|    | (Phenolic)                                                                |      |     |      |     |
| 54 | 4'-geranyloxyferulic acid.<br>(Phenolic)                                  | High | Yes | 0.55 | Yes |
| 55 | Hydroxysafflor yellow A<br>(Phenolic)                                     | High | Yes | 0.55 | Yes |
| 56 | Schizandrin A<br>(Phenolic)                                               | Low  | No  | 0.55 | No  |
| 57 | Forsythiaside A<br>(Phenolic)                                             | High | Yes | 0.55 | Yes |
| 58 | Trilobatin<br>(Phenolic)                                                  | High | Yes | 0.55 | Yes |
| 59 | Ferulic acid<br>(Phenolic)                                                | High | Yes | 0.55 | Yes |
| 60 | Lithospermic acid<br>(Phenolic)                                           | Low  | No  | 0.55 | No  |
| 61 | Epicatechin<br>(Flavonoid)                                                | High | Yes | 0.55 | Yes |
| 62 | Isoliquiritigenin<br>(Flavonoid)                                          | High | Yes | 0.55 | Yes |
| 63 | Gardenin<br>(Flavonoid)                                                   | Low  | No  | 0.55 | No  |
| 64 | Scutellarin<br>(Flavonoid)                                                | High | Yes | 0.55 | Yes |
| 65 | Icaritin<br>(Flavonoid)                                                   | High | Yes | 0.55 | Yes |
| 66 | Nobiletin<br>(Flavonoid)                                                  | High | Yes | 0.55 | Yes |
| 67 | Apigenin-7-O- $\beta$ -D-(-6"-p-coumaroyl)-glucopyranoside<br>(Flavonoid) | Low  | No  | 0.55 | No  |
| 68 | Myricetin<br>(Flavonoid)                                                  | High | Yes | 0.55 | Yes |
| 69 | Silibinin-C-2',3-bis hydrogensuccinate                                    | High | Yes | 0.55 | Yes |

|    |                                                        |      |     |      |     |
|----|--------------------------------------------------------|------|-----|------|-----|
|    | t<br>(Flavonoid)                                       |      |     |      |     |
| 70 | Butein<br>(Flavonoid)                                  | High | Yes | 0.55 | No  |
| 71 | Wogonin<br>(Flavonoid)                                 | High | Yes | 0.55 | Yes |
| 72 | Isoquercetin<br>(Flavonoid)                            | High | Yes | 0.55 | Yes |
| 73 | 6"-O-<br>succinylapigenin<br>(Flavonoid)               | Low  | No  | 0.55 | No  |
| 74 | Luteoloside<br>(Flavonoid)                             | High | Yes | 0.55 | Yes |
| 75 | Biochanin A<br>(Flavonoid)                             | High | Yes | 0.55 | Yes |
| 76 | Xanthohumol<br>(Flavonoid)                             | Low  | No  | 0.55 | No  |
| 77 | Galuteolin<br>(Flavonoid)                              | High | Yes | 0.55 | Yes |
| 78 | Isoquercetin<br>(Flavonoid)                            | High | Yes | 0.55 | Yes |
| 79 | Baicalein<br>(Flavonoid)                               | High | Yes | 0.55 | Yes |
| 80 | Baicalin<br>(Flavonoid)                                | Low  | No  | 0.55 | No  |
| 81 | Xanthohumol<br>(Chalcone,<br>flavonoid)                | High | Yes | 0.55 | Yes |
| 82 | Naringenin<br>(Flavonoid)                              | High | Yes | 0.55 | Yes |
| 83 | Puerarin<br>(Flavonoid)                                | High | Yes | 0.55 | Yes |
| 84 | Calycosin<br>(Favonoid)                                | High | Yes | 0.55 | Yes |
| 85 | Calycosin-7-o- $\beta$ -<br>d-glucoside<br>(Flavonoid) | Low  | No  | 0.55 | No  |
| 86 | Lutein<br>(Flavonoid)                                  | High | Yes | 0.55 | Yes |
| 87 | Apigenin<br>(Flavonoid)                                | High | Yes | 0.55 | Yes |
| 88 | Breviscapine                                           | Low  | No  | 0.55 | No  |

|     |                                                                                                                    |      |     |      |     |
|-----|--------------------------------------------------------------------------------------------------------------------|------|-----|------|-----|
|     | (Flavone)                                                                                                          |      |     |      |     |
| 89  | Silibinin<br>(Flavonoid)                                                                                           | High | Yes | 0.55 | Yes |
| 90  | 5,7,3',4',5'-<br>pentahydroxy<br>dihydroflavanol-<br>3O-(2''-O-<br>galloyl)-β-D-<br>glucopyranoside<br>(Flavonoid) | High | Yes | 0.55 | Yes |
| 91  | Anthocyanin<br>(Flavonoid)                                                                                         | High | Yes | 0.55 | Yes |
| 92  | Genistein<br>(Flavonoid)                                                                                           | Low  | No  | 0.55 | No  |
| 93  | Equol (4', 7<br>isoflavandiol)<br>(flavonoid)                                                                      | High | Yes | 0.55 | Yes |
| 94  | Luteolin<br>(Flavonoid)                                                                                            | High | Yes | 0.55 | Yes |
| 95  | Polygalasaponin<br>F<br>(Saponin)                                                                                  | High | Yes | 0.55 | Yes |
| 96  | Ruscogenin<br>(Saponin)                                                                                            | High | Yes | 0.55 | Yes |
| 97  | Dioscin<br>(Saponin)                                                                                               | Low  | No  | 0.55 | No  |
| 98  | Diosgenin<br>(Saponin)                                                                                             | High | Yes | 0.55 | Yes |
| 99  | Glycyrrhizin<br>(Saponin)                                                                                          | Low  | No  | 0.55 | No  |
| 100 | S-allyl cysteine<br>(Sulphur<br>containing<br>compound)                                                            | High | Yes | 0.55 | Yes |
| 101 | (DATs) di-allyl<br>trisulfide<br>(Sulphur<br>containing<br>compound)                                               | High | Yes | 0.55 | Yes |
| 102 | 3H-1,2-dithiole-                                                                                                   | High | Yes | 0.55 | Yes |

|     |                                            |      |     |      |     |
|-----|--------------------------------------------|------|-----|------|-----|
|     | 3- (Sulphur containing compound)           |      |     |      |     |
| 103 | Sulforaphane (Sulphur containing compound) | High | Yes | 0.55 | Yes |
| 104 | Lipoic acid (Sulphur containing compound)  | Low  | No  | 0.55 | No  |
| 105 | Allicin (Sulphur containing compound)      | High | Yes | 0.55 | Yes |
| 106 | Guattegaumerine (Alkaloid)                 | High | Yes | 0.55 | Yes |
| 107 | Spiramin T (Alkaloid)                      | Low  | No  | 0.55 | No  |
| 108 | Huperzine A (Alkaloid)                     | High | Yes | 0.55 | Yes |
| 109 | Sinomenine, (alkaloid)                     | High | Yes | 0.55 | Yes |
| 110 | Leonurine (Alkaloid)                       | High | Yes | 0.55 | Yes |
| 111 | Neferine (Alkaloid)                        | Low  | No  | 0.55 | No  |
| 112 | Ephedrine (Alkaloid)                       | High | Yes | 0.55 | Yes |
| 113 | Swertiamarin (Iridoid)                     | High | Yes | 0.55 | Yes |
| 114 | Cornel (Iridoid)                           | High | Yes | 0.55 | Yes |
| 115 | Cornin (Iridoid)                           | High | Yes | 0.55 | Yes |
| 116 | Jasminoidin (Iridoid)                      | Low  | No  | 0.55 | No  |
| 117 | Beta carotene (Carotenoid)                 | High | Yes | 0.55 | Yes |
| 118 | b-cryptoxanthin (Carotenoid)               | Low  | No  | 0.55 | No  |

|                                                             |                                              |      |     |      |     |
|-------------------------------------------------------------|----------------------------------------------|------|-----|------|-----|
| 119                                                         | Zeaxanthin<br>(Carotenoid)                   | High | Yes | 0.55 | Yes |
| 120                                                         | Astaxanthin<br>(Carotenoid)                  | High | Yes | 0.55 | Yes |
| 121                                                         | Dihydrocapsaicin<br>(Carotenoid)             | High | Yes | 0.55 | Yes |
| 122                                                         | Crocin<br>(Carotenoid)                       | High | Yes | 0.55 | Yes |
| 123                                                         | Polysaccharides<br>(Miscellaneous)           | Low  | No  | 0.55 | No  |
| 124                                                         | Ginkgolide B<br>(Miscellaneous)              | High | Yes | 0.55 | Yes |
| 125                                                         | Oleuropein<br>(Miscellaneous)                | High | Yes | 0.55 | Yes |
| 126                                                         | Embelin<br>(Miscellaneous)                   | Low  | No  | 0.55 | No  |
| 127                                                         | Phycocyanobilin<br>(Miscellaneous)           | High | Yes | 0.55 | Yes |
| 128                                                         | Hyperforin<br>(Miscellaneous)                | High | Yes | 0.55 | Yes |
| 129                                                         | Withaferin A<br>(Miscellaneous)              | High | Yes | 0.55 | Yes |
| 130                                                         | Carnosine<br>(Miscellaneous)                 | High | Yes | 0.55 | Yes |
| 131                                                         | Phycocyanobilin<br>(Miscellaneous)           | High | Yes | 0.55 | Yes |
| <b>II. Bioactives for management of myocardial ischemia</b> |                                              |      |     |      |     |
| 132                                                         | Astragaloside<br>(Terpenoid)                 | Low  | No  | 0.55 | No  |
| 133                                                         | Protocatechualdehyde<br>(Phenolic)           | High | Yes | 0.55 | Yes |
| 134                                                         | Cyanidin-3-O-D-glucopyranoside<br>(Phenolic) | High | Yes | 0.55 | Yes |
| 135                                                         | Tetrandrine<br>(Phenolic)                    | Low  | No  | 0.55 | No  |

|     |                             |      |     |      |     |
|-----|-----------------------------|------|-----|------|-----|
| 136 | Fisetin<br>(Flavonoid)      | High | Yes | 0.55 | Yes |
| 137 | Palmatine,<br>(Flavonoid)   | High | Yes | 0.55 | Yes |
| 138 | Isorhamnetin<br>(Flavonoid) | High | Yes | 0.55 | Yes |
| 139 | Pinocembrin<br>(Flavonoid)  | High | Yes | 0.55 | Yes |
| 140 | Berberine,<br>(Alkaloid)    | High | Yes | 0.55 | Yes |
| 141 | Cyclobuxine<br>(Alkaloid)   | High | Yes | 0.55 | Yes |
| 142 | Picroside II<br>(Iridoid)   | Low  | No  | 0.55 | Yes |
| 143 | Lycopene<br>(Carotenoid)    | High | Yes | 0.55 | Yes |

1A

No. of compounds extracted from each plant source

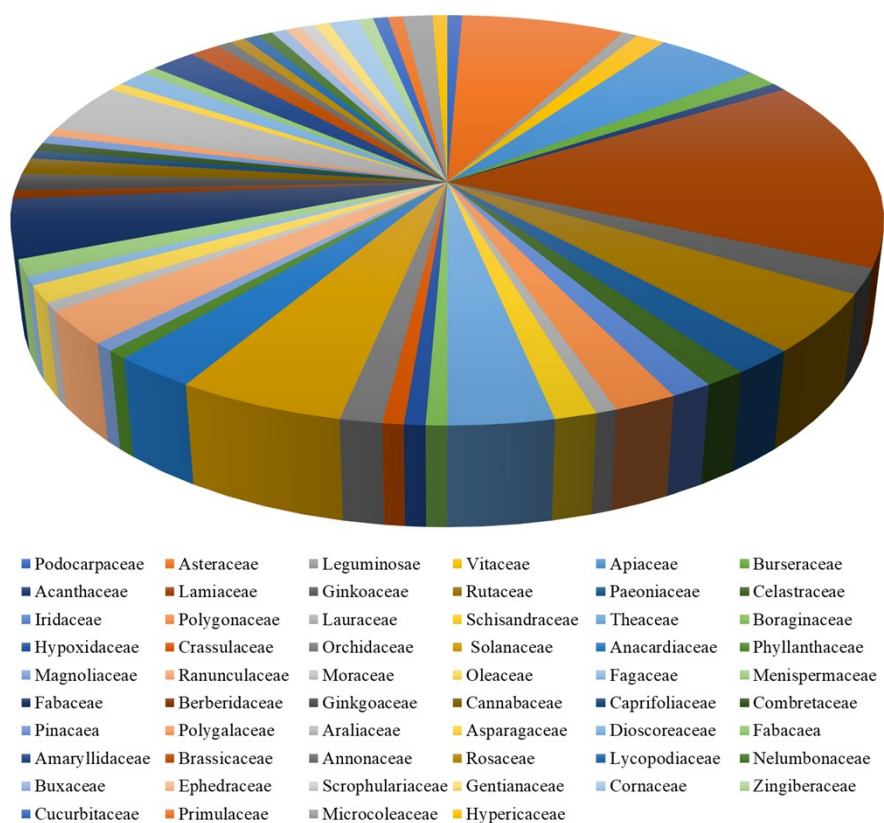

1B

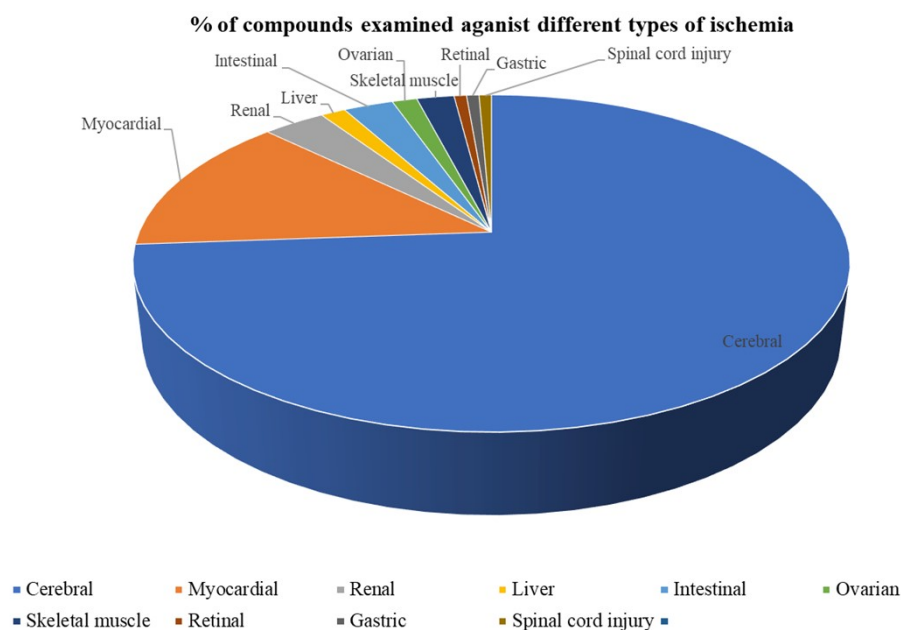

**Figure S1** Plant families reported to contain anti-ischemic bioactives (A) and the relative number of bioactives examined against different types of ischemia (B).

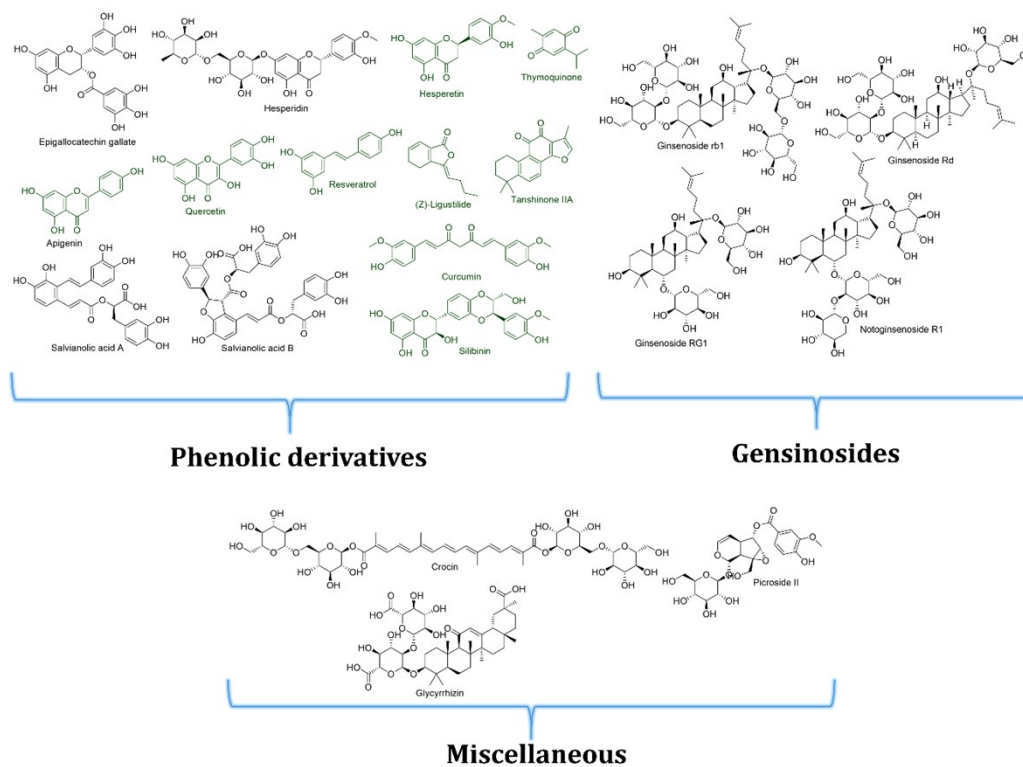



**Figure S2.** Anti-ischemic natural products collected from literature in the present review. Green-colored compounds have drug-like properties according to Lipinski's and Veber's rules of drug-likeness.

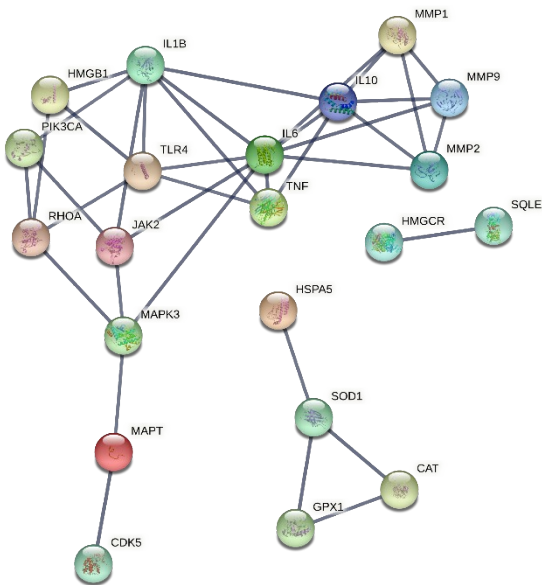

**Figure S3.** Sub-PPI network constructed from proteins predicted and/or reported to be targeted by the collected natural products in the present investigation. This network consists of 21 nodes and 37 edges with an average node degree of 2.47.

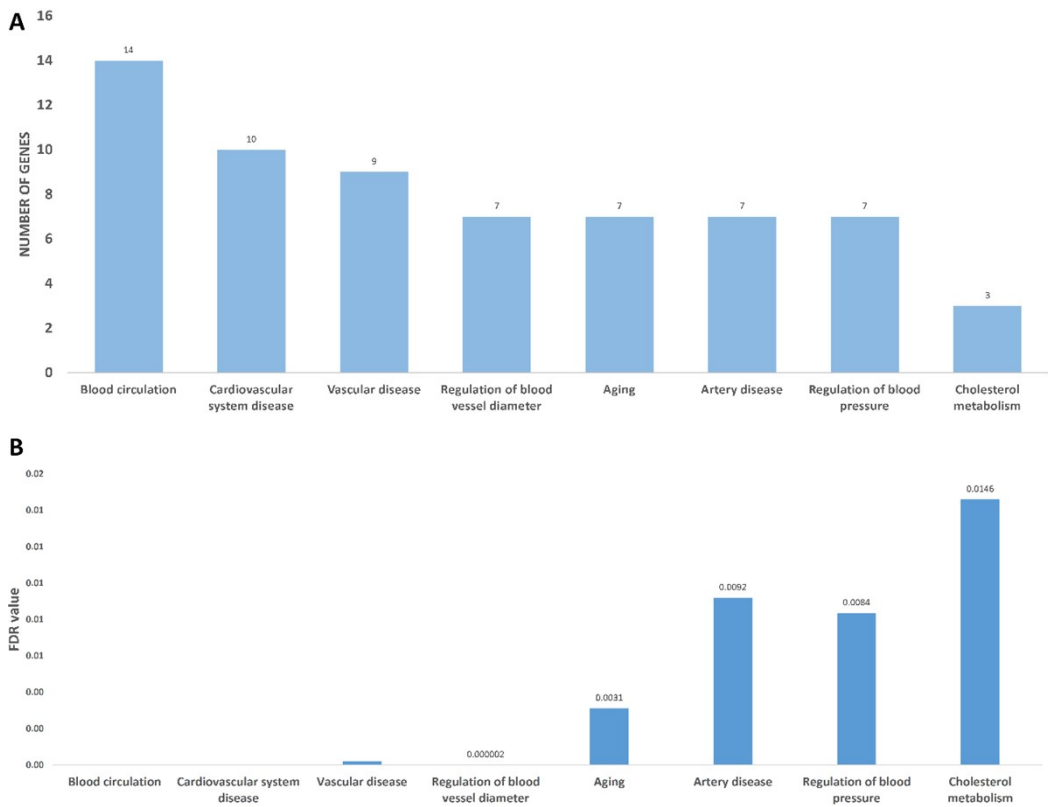

**Figure S4.** KEGG pathway enrichment. (A) *X*-axis is enrichment gene count, *Y*-axis is KEGG pathway. (B) False discovery rate (FDR) of each annotated pathway.

## ***Experimental***

### **1. Target Proteins of ischemia**

Ischemia-related target proteins (**Table S2**) were retrieved from the publicly available databases: GeneCards (<https://www.genecards.org/>; accessed on 22 August 2021) [142]. The words “myocardial ischemia, and cerebral ischemia” were used as the keywords, and the species was set as “*Homo sapiens*”. Additionally, literature from 1990 until 2021 were reviewed for additional targets related both myocardial and cerebral ischemia. Google scholar was used for this literature review- based search using the same keywords: myocardial ischemia, and cerebral ischemia.

### **2. Determination of the Potential Protein Targets for the most prominent 20 compounds**

The potential protein targets for the most prominent 20 compounds were proposed by subjecting all of these compounds structures to inverse docking against all proteins hosted in the Protein Data Bank (PDB; <https://www.rcsb.org/>). The idTarget platform (<http://idtarget.rcas.sinica.edu.tw/>) was used for this task. This structure-based screening software applies a unique docking approach called divide-and-conquer docking that adaptively builds small overlapping grids to make the searching space on the protein surfaces more constrained. Hence, it can run a huge number of accurate docking experiments in a much-reduced time [143]. The retrieved results were obtained as a list of binding affinity scores arranged from the highest negative to the lowest. We set a binding affinity score of -7 kcal/mol as a cut-off value to select the best targets for each compound structure. Considering the collected human myocardial and cerebral ischemia-related proteins, 9 protein targets were obtained for the selected 20 compounds.

Another pharmacophore-based virtual screening platform called SwissTargetPrediction (<http://www.swisstargetprediction.ch/>) [144] was used to predict potential targets for the same

compounds. The species was set as “*Homo sapiens*” and a probability score of 100% was set as a cut-off value.

### 3. Networks Construction and Functional Enrichment Analysis

Three types of networks were generated: (i) a network of compound-protein-pathway interactions (CPPI) based on the prediction results. Links between the selected 20 compounds and ischemia-related target proteins were generated in this network; (ii) a protein-protein interaction (PPI) network summarizing interactions between ischemia-relevant proteins. The proteins that were predicted to be probable targets for the selected compounds were submitted to the STRING database (<https://string-db.org/>) [145] for protein-protein interaction (PPI) analysis, where “*Homo sapiens*” was set as the search species, the interaction score was set to 0.9 (the maximum confidence), and the rest of the parameters were selected according to the default setting; (iii) a protein-pathway interaction network that showed the interactions between ischemia-related proteins and their associated signaling pathways. This network was constructed after KEGG pathway enrichment analysis. All the aforementioned networks were built using the Cytoscape 3.9.2 (<https://www.cytoscape.org/>) [146] network visualization and analysis software tool. The pre-installed tools carried out functional enrichment analysis and KEGG pathway annotation for ischemia-relevant targets in Cytoscape 3.9.2.

### 4. Molecular Dynamics Simulation

Desmond v. 2.2 software was used for performing MDS experiments [147–149]. This software applies the OPLS force field. Protein systems were built using the System Builder option, where the protein structure was embedded in an orthorhombic box of TIP3P water together with 0.15 M Na<sup>+</sup> and Cl<sup>-</sup> ions in 20 Å solvent buffer. Afterward, the prepared systems were energy minimized and equilibrated for 10 ns. Desmond software automatically parameterizes inputted ligands during the system building step according to the OPLS force field. Metal-containing proteins like MMPs that contain histidine-Zn<sup>+2</sup> complex in the active site should be parameterized during the protein preparation step. To do so, a hetero state should be generated for hetero atoms like Zn (Generate Hetero States). This function is a part of the maestro's Protein Preparation wizard. This step will enable the formation of a suitable hetero state or co-ordinate covalent state for the heteroatom (i.e. Zn<sup>+2</sup>) in complex with the protein so that force fields like OPLS can easily recognize the zinc atom. For simulations performed by NAMD [150], the parameters and topologies of the compounds were calculated either using the Charmm27 force field with the online software

Ligand Reader and Modeler (<http://www.charmm-gui.org/?doc=input/ligandrm>) [151] or using the VMD plugin Force Field Toolkit (ffTK). Afterward, the generated parameters and topology files were loaded to VMD to readily read the protein–ligand complexes without errors and then conduct the simulation step. For MMPs, harmonic Tcl forces were applied to keep Zn<sup>+2</sup> in place.

## 5. Binding Free Energy Calculations

Binding free energy calculations ( $\Delta G$ ) were performed using the free energy perturbation (FEP) method [150]. This method was described in detail in the recent article by Kim and coworkers [150]. Briefly, this method calculates the binding free energy  $\Delta G_{\text{binding}}$  according to the following equation:  $\Delta G_{\text{binding}} = \Delta G_{\text{Complex}} - \Delta G_{\text{Ligand}}$ . The value of each  $\Delta G$  is estimated from a separate simulation using NAMD software. Interestingly, all input files required for simulation by NAMD can be papered by using the online website CharmmGUI (<https://charmmgui.org/?doc=input/afes.abinding>). Subsequently, we can use these files in NAMD to produce the required simulations using the FEP calculation function in NAMD. The equilibration was achieved in the NPT ensemble at 300 K and 1 atm (1.01325 bar) with Langevin piston pressure (for “Complex” and “Ligand”) in the presence of the TIP3P water model. Then, 10 ns FEP simulations were performed for each compound, and the last 5 ns of the free energy values was measured for the final free energy values [150]. Finally, the generated trajectories were visualized and analyzed using VMD software.

## References

1. Tao, T., et al., *Natural medicine in neuroprotection for ischemic stroke: Challenges and prospective*. Pharmacology & Therapeutics, 2020: p. 107695.
2. He, Y., K. Jiang, and X. Zhao, *Taraxasterol protects hippocampal neurons from oxygen-glucose deprivation-induced injury through activation of Nrf2 signalling pathway*. Artificial cells, nanomedicine, and biotechnology, 2020. **48**(1): p. 252-258.
3. Yang, D., W. Jia, and Y.Z. Zhu, *Leonurine, a potential agent of traditional Chinese medicine: recent updates and future perspectives*. Natural product communications, 2016. **11**(11): p. 1934578X1601101130.
4. Jiang, W.L., et al., *Cornin ameliorates cerebral infarction in rats by antioxidant action and stabilization of mitochondrial function*. Phytotherapy Research: An International Journal Devoted to Pharmacological and Toxicological Evaluation of Natural Product Derivatives, 2010. **24**(4): p. 547-552.
5. Wang, T., et al., *Protection by tetrahydroxystilbene glucoside against cerebral ischemia: involvement of JNK, SIRT1, and NF- $\kappa$ B pathways and inhibition of intracellular ROS/RNS generation*. Free Radical Biology and Medicine, 2009. **47**(3): p. 229-240.
6. Duan, Z.Z., et al., *Protection of Momordica charantia polysaccharide against intracerebral hemorrhage-induced brain injury through JNK3 signaling pathway*. J Recept Signal Transduct Res, 2015. **35**(6): p. 523-9.

7. Dong, K., et al., *Neuroprotective effects of Tanshinone IIA on permanent focal cerebral ischemia in mice*. *Phytotherapy Research: An International Journal Devoted to Pharmacological and Toxicological Evaluation of Natural Product Derivatives*, 2009. **23**(5): p. 608-613.
8. Mahmood, Q., et al., *Salvianolic acid A inhibits calpain activation and eNOS uncoupling during focal cerebral ischemia in mice*. *Phytomedicine*, 2017. **25**: p. 8-14.
9. Ahn, S.M., et al., *Emodin from Polygonum multiflorum ameliorates oxidative toxicity in HT22 cells and deficits in photothrombotic ischemia*. *Journal of Ethnopharmacology*, 2016. **188**: p. 13-20.
10. Yu, H., et al., *Oleuropein, a natural extract from plants, offers neuroprotection in focal cerebral ischemia/reperfusion injury in mice*. *European Journal of Pharmacology*, 2016. **775**: p. 113-119.
11. Yang, G., et al., *Tetramethylpyrazine Protects Against Oxygen-Glucose Deprivation-Induced Brain Microvascular Endothelial Cells Injury via Rho/Rho-kinase Signaling Pathway*. *Cellular and Molecular Neurobiology*, 2017. **37**(4): p. 619-633.
12. Thippeswamy, B.S., et al., *Protective Effect of Embelin from Embelia ribes Burm. Against Transient Global Ischemia-Induced Brain Damage in Rats*. *Neurotoxicity Research*, 2011. **20**(4): p. 379.
13. Marín-Prida, J., et al., *Phycocyanobilin promotes PC12 cell survival and modulates immune and inflammatory genes and oxidative stress markers in acute cerebral hypoperfusion in rats*. *Toxicology and Applied Pharmacology*, 2013. **272**(1): p. 49-60.
14. Yang, Z.-B., et al., *Beneficial effect of magnesium lithospermate B on cerebral ischemia–reperfusion injury in rats involves the regulation of miR-107/glutamate transporter 1 pathway*. *European Journal of Pharmacology*, 2015. **766**: p. 91-98.
15. Zhao, Y., et al., *Chrysophanol attenuates nitrosative/oxidative stress injury in a mouse model of focal cerebral ischemia/reperfusion*. *Journal of Pharmacological Sciences*, 2018. **138**(1): p. 16-22.
16. Li, Y., et al., *Protective effect of celastrol in rat cerebral ischemia model: Down-regulating p-JNK, p-c-Jun and NF-κB*. *Brain Research*, 2012. **1464**: p. 8-13.
17. Hao, M., et al., *Triptolide Protects Against Ischemic Stroke in Rats*. *Inflammation*, 2015. **38**(4): p. 1617-1623.
18. Lee, T.H., C.H. Jung, and D.-H. Lee, *Neuroprotective effects of Schisandrin B against transient focal cerebral ischemia in Sprague–Dawley rats*. *Food and Chemical Toxicology*, 2012. **50**(12): p. 4239-4245.
19. Grewal, A.K., T.G. Singh, and N. Singh, *POTENTIAL HERBAL DRUGS FOR ISCHEMIC STROKE: A REVIEW*. *Plant Archives*, 2020. **20**(1): p. 3772-3783.
20. Ma, Y., J.C. Sullivan, and D.A. Schreihof, *Dietary genistein and equol (4', 7 isoflavandiol) reduce oxidative stress and protect rats against focal cerebral ischemia*. *American Journal of Physiology-Regulatory, Integrative and Comparative Physiology*, 2010. **299**(3): p. R871-R877.
21. Zahran, E.M., et al., *Diversity, phytochemical and medicinal potential of the genus Ocimum L.(Lamiaceae)*. *Phytochemistry Reviews*, 2020. **19**: p. 907-953.
22. Ghosh, A., et al., *Neuroprotective role of nanoencapsulated quercetin in combating ischemia-reperfusion induced neuronal damage in young and aged rats*. *PLoS One*, 2013. **8**(4): p. e57735.
23. Zhang, Y.-C., et al., *Antioxidant and Nrf2 inducing activities of luteolin, a flavonoid constituent in Ixeris sonchifolia Hance, provide neuroprotective effects against ischemia-induced cellular injury*. *Food and Chemical Toxicology*, 2013. **59**: p. 272-280.

24. Lee, E.J., et al., *Therapeutic window for cinnamophilin following oxygen–glucose deprivation and transient focal cerebral ischemia*. Experimental Neurology, 2009. **217**(1): p. 74-83.
25. Albert, D., et al., *Hyperforin is a dual inhibitor of cyclooxygenase-1 and 5-lipoxygenase*. Biochemical Pharmacology, 2002. **64**(12): p. 1767-1775.
26. Zhu, J., et al., *Suppression of local inflammation contributes to the neuroprotective effect of ginsenoside Rb1 in rats with cerebral ischemia*. Neuroscience, 2012. **202**: p. 342-351.
27. Bae, E.-A., et al., *Ginsenosides Rg3 and Rh2 inhibit the activation of AP-1 and protein kinase A pathway in lipopolysaccharide/interferon- $\gamma$ -stimulated BV-2 microglial cells*. Planta medica, 2006. **72**(07): p. 627-633.
28. Liu, X., et al., *Efficacy and safety of ginsenoside-Rd for acute ischaemic stroke: a randomized, double-blind, placebo-controlled, phase II multicenter trial*. European journal of neurology, 2009. **16**(5): p. 569-575.
29. Guan, T., et al., *Ruscogenin reduces cerebral ischemic injury via NF- $\kappa$ B-mediated inflammatory pathway in the mouse model of experimental stroke*. European Journal of Pharmacology, 2013. **714**(1): p. 303-311.
30. Zhang, W.-D., et al., *Astragaloside IV from Astragalus membranaceus shows cardioprotection during myocardial ischemia in vivo and in vitro*. Planta medica, 2006. **72**(01): p. 4-8.
31. Bai, F., et al., *Free energy landscape for the binding process of Huperzine A to acetylcholinesterase*. Proceedings of the National Academy of Sciences, 2013. **110**(11): p. 4273-4278.
32. Wu, W.N., et al., *Sinomenine protects against ischaemic brain injury: Involvement of co-inhibition of acid-sensing ion channel 1a and L-type calcium channels*. British journal of pharmacology, 2011. **164**(5): p. 1445-1459.
33. Bae, O.-N., et al., *Safety and efficacy evaluation of carnosine, an endogenous neuroprotective agent for ischemic stroke*. Stroke, 2013. **44**(1): p. 205-212.
34. Krishnamurthy, R.G., et al., *Asiatic acid, a pentacyclic triterpene from Centella asiatica, is neuroprotective in a mouse model of focal cerebral ischemia*. Journal of neuroscience research, 2009. **87**(11): p. 2541-2550.
35. Shati, A.A., *Xanthohumol protects against renal ischaemia reperfusion (I/R) injury by scavenging ROS and inhibition of JAK-2/STAT-3 inflammatory pathway*. Journal of Taibah University for Science, 2017. **11**(3): p. 458-470.
36. Raza, S.S., et al., *Neuroprotective effect of naringenin is mediated through suppression of NF- $\kappa$ B signaling pathway in experimental stroke*. Neuroscience, 2013. **230**: p. 157-171.
37. Zhu, S., S. Tang, and F. Su, *Dioscin inhibits ischemic stroke-induced inflammation through inhibition of the TLR4/MyD88/NF- $\kappa$ B signaling pathway in a rat model*. Molecular Medicine Reports, 2018. **17**(1): p. 660-666.
38. Zhang, Z.-j., et al., *A comparative study on the individual and combined effects of baicalin and jasminoidin on focal cerebral ischemia–reperfusion injury*. Brain Research, 2006. **1123**(1): p. 188-195.
39. Jivad, N. and Z. Rabiei, *Review on herbal medicine on brain ischemia and reperfusion*. Asian Pacific Journal of Tropical Biomedicine, 2015. **5**(10): p. 789-795.
40. Gupta, Y.K., S. Briyal, and A. Gulati, *Therapeutic potential of herbal drugs in cerebral ischemia*. Indian J Physiol Pharmacol, 2010. **54**(2): p. 99-122.
41. Ergün, Y., et al., *Antioxidant effect of Legalon (r) SIL in ischemia-reperfusion injury of rat skeletal muscle*. Acta cirurgica brasileira, 2016. **31**(4): p. 264-270.
42. Al-Snafi, A.E., *The pharmacology of Crocus sativus-A review*. IOSR Journal of Pharmacy, 2016. **6**(6): p. 8-38.

43. Ma, S., et al., *Neuroprotective effect of ginkgolide K against acute ischemic stroke on middle cerebral ischemia occlusion in rats*. Journal of Natural Medicines, 2012. **66**(1): p. 25-31.
44. Ghosh, N., et al., *Advances in herbal medicine for treatment of ischemic brain injury*. Natural product communications, 2014. **9**(7): p. 1934578X1400900739.
45. Wu, J.-b., et al., *Protective effects of paeonol on cultured rat hippocampal neurons against oxygen–glucose deprivation-induced injury*. Journal of the neurological sciences, 2008. **264**(1-2): p. 50-55.
46. Cai, B., et al., *Therapeutic potential of diosgenin and its major derivatives against neurological diseases: recent advances*. Oxidative medicine and cellular longevity, 2020. **2020**.
47. Li, H., et al., *Carnosic acid nanoparticles suppress liver ischemia/reperfusion injury by inhibition of ROS, Caspases and NF- $\kappa$ B signaling pathway in mice*. Biomedicine & Pharmacotherapy, 2016. **82**: p. 237-246.
48. Ramazanoglu, M.A., et al., *Effects of butein on renal ischemia/reperfusion injury: An experimental study*. Archivio Italiano di Urologia e Andrologia, 2020. **92**(4).
49. Genovese, S., et al., *A natural propenoic acid derivative activates peroxisome proliferator-activated receptor- $\beta/\delta$  (PPAR $\beta/\delta$ )*. Life sciences, 2010. **86**(13-14): p. 493-498.
50. Lee, I.-K., J.-H. Lee, and B.-S. Yun, *Polychlorinated compounds with PPAR- $\gamma$  agonistic effect from the medicinal fungus Phellinus ribis*. Bioorganic & medicinal chemistry letters, 2008. **18**(16): p. 4566-4568.
51. Dong, L., et al., *Parthenolide Is Neuroprotective in Rat Experimental Stroke Model: Downregulating NF- $\kappa$ B, Phospho-p38MAPK, and Caspase-1 and Ameliorating BBB Permeability*. Mediators of Inflammation, 2013. **2013**: p. 370804.
52. Kara, S., et al., *Protective effect of hesperetin and naringenin against apoptosis in ischemia/reperfusion-induced retinal injury in rats*. The Scientific World Journal, 2014. **2014**.
53. Lü, Q., et al., *Guattegaumerine protects primary cultured cortical neurons against oxidative stress injury induced by hydrogen peroxide concomitant with serum deprivation*. Cellular and molecular neurobiology, 2009. **29**(3): p. 355.
54. Park, E.J., et al., *Honokiol Protects the Kidney from Renal Ischemia and Reperfusion Injury by Upregulating the Glutathione Biosynthetic Enzymes*. Biomedicines, 2020. **8**(9).
55. Chen, K., et al., *Berberine reduces ischemia/reperfusion-induced myocardial apoptosis via activating AMPK and PI3K–Akt signaling in diabetic rats*. Apoptosis, 2014. **19**(6): p. 946-957.
56. Kim, Y.M., et al., *Palmitine from Coptidis rhizoma reduces ischemia–reperfusion-mediated acute myocardial injury in the rat*. Food and Chemical Toxicology, 2009. **47**(8): p. 2097-2102.
57. Xue, L., et al., *Effect and mechanism of salvianolic acid B on the myocardial ischemia-reperfusion injury in rats*. Asian Pacific Journal of Tropical Medicine, 2014. **7**(4): p. 280-284.

58. Kam, K.-Y., et al., *p-Hydroxybenzyl alcohol prevents brain injury and behavioral impairment by activating Nrf2, PDI, and neurotrophic factor genes in a rat model of brain ischemia*. Molecules and cells, 2011. **31**(3): p. 209-215.
59. Yao, R.-Q., et al., *Cornel iridoid glycoside promotes neurogenesis and angiogenesis and improves neurological function after focal cerebral ischemia in rats*. Brain Research Bulletin, 2009. **79**(1): p. 69-76.
60. Long, L., et al., *Protective effects of fisetin against myocardial ischemia/reperfusion injury*. Experimental and therapeutic medicine, 2020. **19**(5): p. 3177-3188.
61. Xie, W., et al., *Polygalasaponin F inhibits neuronal apoptosis induced by oxygen-glucose deprivation and reoxygenation through the PI3K/Akt pathway*. Basic & clinical pharmacology & toxicology, 2020. **127**(3): p. 196-204.
62. Erboga, M., et al., *Protective effects of thymoquinone on experimental testicular ischaemia–reperfusion injury: an apoptotic, proliferative and biochemical study*. Andrologia, 2016. **48**(2): p. 222-230.
63. Xue, Y., et al., *Safranal, an active constituent of saffron, ameliorates myocardial ischemia via reduction of oxidative stress and regulation of Ca<sup>2+</sup> homeostasis*. Journal of Pharmacological Sciences, 2020. **143**(3): p. 156-164.
64. Zhan, C. and J. Yang, *Protective effects of isoliquiritigenin in transient middle cerebral artery occlusion-induced focal cerebral ischemia in rats*. Pharmacol Res, 2006. **53**(3): p. 303-9.
65. Wu, X., et al., *Ginkgolide B preconditioning protects neurons against ischaemia-induced apoptosis*. Journal of cellular and molecular medicine, 2009. **13**(11-12): p. 4474-4483.
66. Zahran, E.M., et al., *Antiulcer potential and molecular docking of flavonoids from Ocimum forskolei Benth., family Lamiaceae*. Natural product research, 2019: p. 1-5.
67. Guo, H., et al., *Neuroprotective effects of scutellarin against hypoxic-ischemic-induced cerebral injury via augmentation of antioxidant defense capacity*. Chin J Physiol, 2011. **54**(6): p. 399-405.
68. Shan, X., et al., *The Protective Effect of Cyanidin-3-Glucoside on Myocardial Ischemia-Reperfusion Injury through Ferroptosis*. Oxidative Medicine and Cellular Longevity, 2021. **2021**.
69. Behl, T., et al., *Exploring the Multifaceted Therapeutic Potential of Withaferin A and Its Derivatives*. Biomedicines, 2020. **8**(12): p. 571.
70. Xu, Y., et al., *Icaritin activates Nrf2/Keap1 signaling to protect neuronal cells from oxidative stress*. Chemical Biology & Drug Design, 2021. **97**(1): p. 111-120.
71. Xie, W., et al., *Protective Effects and Target Network Analysis of Ginsenoside Rg1 in Cerebral Ischemia and Reperfusion Injury: A Comprehensive Overview of Experimental Studies*. Cells, 2018. **7**(12): p. 270.
72. Chen, T., et al., *Suppressing receptor-interacting protein 140: a new sight for salidroside to treat cerebral ischemia*. Molecular neurobiology, 2016. **53**(9): p. 6240-6250.
73. Yu, L., et al., *Confirmation of potential neuroprotective effects of natural bioactive compounds from traditional medicinal herbs in cerebral ischemia treatment*. Journal of Integrative Neuroscience, 2020. **19**(2): p. 373-384.
74. Gugliandolo, A., P. Bramanti, and E. Mazzon, *Activation of Nrf2 by Natural Bioactive Compounds: A Promising Approach for Stroke?* International Journal of Molecular Sciences, 2020. **21**(14): p. 4875.
75. Wei, X., et al., *Hydroxysafflor yellow A protects rat brains against ischemia-reperfusion injury by antioxidant action*. Neuroscience Letters, 2005. **386**(1): p. 58-62.
76. Zhang, Y., et al., *Paeoniflorin Attenuates Cerebral Ischemia-Induced Injury by Regulating Ca<sup>2+</sup>/CaMKII/CREB Signaling Pathway*. Molecules, 2017. **22**(3): p. 359.



77. Kim, S.W., et al., *Glycyrrhizic acid affords robust neuroprotection in the postischemic brain via anti-inflammatory effect by inhibiting HMGB1 phosphorylation and secretion*. Neurobiol Dis, 2012. **46**(1): p. 147-56.
78. Kang, Z., et al., *Curculigoside A induces angiogenesis through VCAM-1/Egr-3/CREB/VEGF signaling pathway*. Neuroscience, 2014. **267**: p. 232-240.
79. Shah, Z.A., et al., *The flavanol (–)-epicatechin prevents stroke damage through the Nrf2/HO1 pathway*. Journal of Cerebral Blood Flow & Metabolism, 2010. **30**(12): p. 1951-1961.
80. Shi, Y.-S., et al., *Nomilin protects against cerebral ischemia–reperfusion induced neurological deficits and blood–brain barrier disruption via the Nrf2 pathway*. Food & function, 2019. **10**(9): p. 5323-5332.
81. Wang, T., et al., *Nobiletin alleviates cerebral ischemic-reperfusion injury via MAPK signaling pathway*. American journal of translational research, 2019. **11**(9): p. 5967.
82. Rabiei, Z. and M. Rafieian-Kopaei, *Neuroprotective effect of pretreatment with Lavandula officinalis ethanolic extract on blood-brain barrier permeability in a rat stroke model*. Asian Pacific journal of tropical medicine, 2014. **7**: p. S421-S426.
83. Kim, J.-M., et al., *S-Allyl-L-cysteine attenuates cerebral ischemic injury by scavenging peroxynitrite and inhibiting the activity of extracellular signal-regulated kinase*. Free radical research, 2006. **40**(8): p. 827-835.
84. Silva-Islas, C.A., et al., *Diallyl trisulfide protects rat brain tissue against the damage induced by ischemia-reperfusion through the Nrf2 pathway*. Antioxidants, 2019. **8**(9): p. 410.
85. Janyou, A., et al., *Dihydrocapsaicin Attenuates Blood Brain Barrier and Cerebral Damage in Focal Cerebral Ischemia/Reperfusion via Oxidative Stress and Inflammatory*. Scientific Reports, 2017. **7**(1): p. 10556.
86. Albohy, A., et al., *Multitarget in silico studies of Ocimum menthiifolium, family Lamiaceae against SARS-CoV-2 supported by molecular dynamics simulation*. Journal of Biomolecular Structure and Dynamics, 2020: p. 1-11.
87. Gao, K., et al., *A phenolic amide (LyA) isolated from the fruits of Lycium barbarum protects against cerebral ischemia–reperfusion injury via PKCε/Nrf2/HO-1 pathway*. Aging (Albany NY), 2019. **11**(24): p. 12361.
88. Yang, Z., et al., *Protective effects of mangiferin on cerebral ischemia–reperfusion injury and its mechanisms*. European Journal of Pharmacology, 2016. **771**: p. 145-151.
89. Wu, S., et al., *Procyanidin B2 attenuates neurological deficits and blood–brain barrier disruption in a rat model of cerebral ischemia*. Molecular nutrition & food research, 2015. **59**(10): p. 1930-1941.
90. Wu, S., et al., *Myricetin ameliorates brain injury and neurological deficits via Nrf2 activation after experimental stroke in middle-aged rats*. Food & function, 2016. **7**(6): p. 2624-2634.
91. Liu, D., et al., *Protective effects of chlorogenic acid on cerebral ischemia/reperfusion injury rats by regulating oxidative stress-related Nrf2 pathway*. Drug design, development and therapy, 2020. **14**: p. 51-60.
92. Zahran, E.M., et al., *Local anaesthetic potential, metabolic profiling, molecular docking and in silico ADME studies of Ocimum forskolei, family Lamiaceae*. Natural product research, 2020: p. 1-7.
93. Shang, J., et al., *Therapeutic effects of pretreatment with tocovid on oxidative stress in postischemic mice brain*. Journal of Stroke and Cerebrovascular Diseases, 2018. **27**(8): p. 2096-2105.

94. Kuo, P.C., et al., *3H-1,2-Dithiole-3-thione as a novel therapeutic agent for the treatment of ischemic stroke through Nrf2 defense pathway*. Brain Behav Immun, 2017. **62**: p. 180-192.
95. Zhao, H.-D., et al., *Sulforaphane protects liver injury induced by intestinal ischemia reperfusion through Nrf2-ARE pathway*. World journal of gastroenterology: WJG, 2010. **16**(24): p. 3002.
96. Bai, Y., et al., *Biochanin A attenuates myocardial ischemia/reperfusion injury through the TLR4/NF- $\kappa$ B/NLRP3 signaling pathway*. Acta chirurgica brasileira, 2019. **34**(11).
97. Jiao, Y., et al., *Xanthohumol protects neuron from cerebral ischemia injury in experimental stroke*. Molecular biology reports, 2020. **47**(4): p. 2417-2425.
98. Deng, H., et al., *A-lipoic acid protects against cerebral ischemia/reperfusion-induced injury in rats*. Mol Med Rep, 2015. **11**(5): p. 3659-65.
99. Wang, C.-P., et al., *Isoquercetin Ameliorates Cerebral Impairment in Focal Ischemia Through Anti-Oxidative, Anti-Inflammatory, and Anti-Apoptotic Effects in Primary Culture of Rat Hippocampal Neurons and Hippocampal CA1 Region of Rats*. Molecular Neurobiology, 2017. **54**(3): p. 2126-2142.
100. Ding, Y., et al., *Antioxidant and pro-angiogenic effects of corilagin in rat cerebral ischemia via Nrf2 activation*. Oncotarget, 2017. **8**(70): p. 114816.
101. Zhang, S., et al., *A novel, highly-water-soluble apigenin derivative provides neuroprotection following ischemia in male rats by regulating the ERK/Nrf2/HO-1 pathway*. European Journal of Pharmacology, 2019. **855**: p. 208-215.
102. Li, Q., et al., *Luteoloside attenuates neuroinflammation in focal cerebral ischemia in rats via regulation of the PPAR $\gamma$ /Nrf2/NF- $\kappa$ B signaling pathway*. International Immunopharmacology, 2019. **66**: p. 309-316.
103. Zhu, J., L. Wang, and J. Zhang, *Galuteolin inhibited autophagy for neuroprotection against transient focal cerebral ischemia in rats*. NeuroMolecular Medicine, 2020. **22**(4): p. 493-502.
104. Tong, Q., et al., *Notoginsenoside R1 for organs ischemia/reperfusion injury: a preclinical systematic review*. Frontiers in pharmacology, 2019. **10**: p. 1204.
105. Wei, G., et al., *Anti-inflammatory effect of protocatechuic aldehyde on myocardial ischemia/reperfusion injury in vivo and in vitro*. Inflammation, 2013. **36**(3): p. 592-602.
106. Zhu, Y., et al., *A new flavonoid glycoside (APG) isolated from Clematis tangutica attenuates myocardial ischemia/reperfusion injury via activating PKC $\epsilon$  signaling*. Biochimica et Biophysica Acta (BBA) - Molecular Basis of Disease, 2017. **1863**(3): p. 701-711.
107. Xu, Y., et al., *Cardioprotective effect of isorhamnetin against myocardial ischemia reperfusion (I/R) injury in isolated rat heart through attenuation of apoptosis*. Journal of cellular and molecular medicine, 2020. **24**(11): p. 6253-6262.
108. Hu, Y., et al., *Senkyunolide I protects rat brain against focal cerebral ischemia–reperfusion injury by up-regulating p-Erk1/2, Nrf2/HO-1 and inhibiting caspase 3*. Brain Research, 2015. **1605**: p. 39-48.
109. Zhou, F., et al., *Schizandrin A protects against cerebral ischemia-reperfusion injury by suppressing inflammation and oxidative stress and regulating the AMPK/Nrf2 pathway regulation*. American Journal of Translational Research, 2019. **11**(1): p. 199.
110. Chan, S.J., et al., *Neuroprotective effects of andrographolide in a rat model of permanent cerebral ischaemia*. British journal of pharmacology, 2010. **161**(3): p. 668-679.
111. Ma, T., Y.L. Shi, and Y.L. Wang, *Forsythiaside A protects against focal cerebral ischemic injury by mediating the activation of the Nrf2 and endoplasmic reticulum stress pathways*. Molecular medicine reports, 2019. **20**(2): p. 1313-1320.

112. Ding, Y., et al., *Posttreatment with 11-Keto- $\beta$ -Boswellic Acid Ameliorates Cerebral Ischemia–Reperfusion Injury: Nrf2/HO-1 Pathway as a Potential Mechanism*. Molecular Neurobiology, 2015. **52**(3): p. 1430-1439.
113. Ding, Y., et al., *Enhanced Neuroprotection of Acetyl-11-Keto- $\beta$ -Boswellic Acid (AKBA)-Loaded O-Carboxymethyl Chitosan Nanoparticles Through Antioxidant and Anti-Inflammatory Pathways*. Molecular Neurobiology, 2016. **53**(6): p. 3842-3853.
114. Wang, H., et al., *Neuroprotective Effect of Swertiamain on Cerebral Ischemia/Reperfusion Injury by Inducing the Nrf2 Protective Pathway*. ACS Chem Neurosci, 2019. **10**(5): p. 2276-2286.
115. Wu, C., et al., *Mitochondrial protective effect of neferine through the modulation of nuclear factor erythroid 2-related factor 2 signalling in ischaemic stroke*. British journal of pharmacology, 2019. **176**(3): p. 400-415.
116. Wu, G., et al., *Britanin Ameliorates Cerebral Ischemia–Reperfusion Injury by Inducing the Nrf2 Protective Pathway*. Antioxidants & Redox Signaling, 2017. **27**(11): p. 754-768.
117. Chen, Z., et al., *Osthole, a natural coumarin improves cognitive impairments and BBB dysfunction after transient global brain ischemia in C57 BL/6J mice: involvement of Nrf2 pathway*. Neurochemical research, 2015. **40**(1): p. 186-194.
118. Cheng, C.Y., S.T. Kao, and Y.C. Lee, *Ferulic Acid Exerts Anti-apoptotic Effects against Ischemic Injury by Activating HSP70/Bcl-2- and HSP70/Autophagy-Mediated Signaling after Permanent Focal Cerebral Ischemia in Rats*. Am J Chin Med, 2019. **47**(1): p. 39-61.
119. Janssens, D., et al., *Protection by bilobalide of the ischaemia-induced alterations of the mitochondrial respiratory activity*. Fundamental & clinical pharmacology, 2000. **14**(3): p. 193-201.
120. Bahonar, A., et al., *Carotenoids as potential antioxidant agents in stroke prevention: A systematic review*. International journal of preventive medicine, 2017. **8**.
121. Zhang, F., et al.,  *$\beta$ -cryptoxanthin alleviates myocardial ischaemia/reperfusion injury by inhibiting NF- $\kappa$ B-mediated inflammatory signalling in rats*. Arch Physiol Biochem, 2020: p. 1-8.
122. Tong, C., et al., *Intravenous Administration of Lycopene, a Tomato Extract, Protects against Myocardial Ischemia-Reperfusion Injury*. Nutrients, 2016. **8**(3): p. 138.
123. Turkler, C., et al., *The ameliorative effect of lutein on ovarian ischemia-reperfusion injury in rats*. Bratislavske lekarske listy, 2018. **119**(11): p. 713-717.
124. Davey, P.G., et al., *Neuroprotective effects of zeaxanthin in a mouse model of retinal ischemia/reperfusion injury*. Investigative Ophthalmology & Visual Science, 2020. **61**(7): p. 655-655.
125. Qiu, X., et al., *Protective effects of astaxanthin against ischemia/reperfusion induced renal injury in mice*. Journal of translational medicine, 2015. **13**(1): p. 1-9.
126. Seto, S.-W., et al., *Angiogenesis in ischemic stroke and angiogenic effects of Chinese herbal medicine*. Journal of clinical medicine, 2016. **5**(6): p. 56.
127. Yan, X., et al., *Calycosin-7-*O*- $\beta$ -D-glucoside Attenuates OGD/R-Induced Damage by Preventing Oxidative Stress and Neuronal Apoptosis via the SIRT1/FOXO1/PGC-1 $\alpha$  Pathway in HT22 Cells*. Neural Plasticity, 2019. **2019**: p. 8798069.
128. Kumar, V., R.S. Chauhan, and C. Tandon, *Biosynthesis and therapeutic implications of iridoid glycosides from Picrorhiza genus: the road ahead*. Journal of Plant Biochemistry and Biotechnology, 2017. **26**(1): p. 1-13.

129. Wang, Y., et al., *Ursolic Acid Ameliorates Inflammation in Cerebral Ischemia and Reperfusion Injury Possibly via High Mobility Group Box 1/Toll-Like Receptor 4/NFκB Pathway*. Front Neurol, 2018. **9**: p. 253.
130. Zahran, E.M., et al., *Metabolic profiling, histopathological anti-ulcer study, molecular docking and molecular dynamics of ursolic acid isolated from Ocimum forskolei Benth.(family Lamiaceae)*. South African Journal of Botany, 2020. **131**: p. 311-319.
131. Ling, C., et al., *Neuroprotective effect of apigenin against cerebral ischemia/reperfusion injury*. Journal of International Medical Research, 2020. **48**(9): p. 0300060520945859.
132. Ozturk, H., et al., *Lithospermic acid and ischemia/reperfusion injury of the rat small intestine prevention*. Adv Clin Exp Med, 2012. **21**(4): p. 433-9.
133. Kong, X., et al., *Neuroprotective effects of allicin on ischemia-reperfusion brain injury*. Oncotarget, 2017. **8**(61): p. 104492.
134. Yiming, L., et al., *Neuroprotective effects of breviscapine against apoptosis induced by transient focal cerebral ischaemia in rats*. Journal of Pharmacy and Pharmacology, 2008. **60**(3): p. 349-355.
135. Lee, J.H., et al., *Cyclobuxine protects the isolated rat heart from the myocardial injuries produced by ischemia and reperfusion*. Planta Med, 1993. **59**(4): p. 296-301.
136. Shi, C., J. Li, and J. Li, *Ephedrine attenuates cerebral ischemia/reperfusion injury in rats through NF-κB signaling pathway*. Human & Experimental Toxicology, 2020: p. 0960327120975456.
137. Ergün, Y., et al., *Effects of silibinin and ethanol on skeletal muscle ischemia-reperfusion injury*. Acta chirurgica brasileira, 2013. **28**(3): p. 179-184.
138. Yuqin, W., *TETRANDRINE CONTROL PRO-INFLAMMATORY FACTOR TO REDUCE RAT MYOCARDIAL ISCHAEMIC/REPERFUSION INJURY*. Heart, 2012. **98**(Suppl 2): p. E124-E124.
139. Nandy, S., et al., *Efficacious naturally occurring anti-cerebral ischaemia extracts, compounds and formulations data from animal models*. Journal of Biologically Active Products from Nature, 2017. **7**(3): p. 178-199.
140. Pan, Z., et al., *Protective Effect of Anthocyanin on Neurovascular Unit in Cerebral Ischemia/Reperfusion Injury in Rats*. Frontiers in Neuroscience, 2018. **12**(947).
141. Zheng, Y., et al., *Cardioprotective Natural Compound Pinocembrin Attenuates Acute Ischemic Myocardial Injury via Enhancing Glycolysis*. Oxidative Medicine and Cellular Longevity, 2020. **2020**: p. 4850328.
142. Rebhan, M.; Chalifa-Caspi, V.; Prilusky, J.; Lancet, D. GeneCards: A novel functional genomics compendium with automated data mining and query reformulation support. *Bioinformatics (Oxf. Engl.)* **1998**, *14*, 656–664.
143. Wang, J.C.; Chu, P.Y.; Chen, C.M.; Lin, J.H. idTarget: A web server for identifying protein targets of small chemical molecules with robust scoring functions and a divide-and-conquer docking approach. *Nucleic Acids Res.* **2012**, *40*, W393–W399.
144. Gfeller, D., Michielin, O., & Zoete, V. (2013). Shaping the interaction landscape of bioactive molecules. *Bioinformatics*, *29*(23), 3073-3079.
145. Mering, C.V.; Huynen, M.; Jaeggi, D.; Schmidt, S.; Bork, P.; Snel, B. STRING: A database of predicted functional associations between proteins. *Nucleic Acids Res.* **2003**, *31*, 258–261.
146. Smoot, M.E.; Ono, K.; Ruscheinski, J.; Wang, P.L.; Ideker, T. Cytoscape 2.8: New features for data integration and network visualization. *Bioinformatics* **2011**, *27*, 431–432.

147. Bowers, K.J.; Chow, D.E.; Xu, H.; Dror, R.O.; Eastwood, M.P.; Gregersen, B.A.; Klepeis, J.L.; Kolossvary, I.; Moraes, M.A.; Sacerdoti, F.D.; et al. Scalable algorithms for molecular dynamics simulations on commodity clusters. In Proceedings of the SC'06: Proceedings of the 2006 ACM/IEEE Conference on Supercomputing, Tampa, FL, USA, 11–17 November 2006; IEEE: New York, NY, USA, 2006; p. 43..
148. Release, S. 3: Desmond Molecular Dynamics System, DE Shaw Research, New York, NY, 2017; Maestro-Desmond Interoperability Tools, Schrödinger: New York, NY, USA, 2017. 7. Schrodinger LLC. Maestro, Version 9.0; Schrodinger LLC: New York, NY, USA, 2009.
149. Phillips, J.C.; Braun, R.; Wang, W.; Gumbart, J.; Tajkhorshid, E.; Villa, E.; Chipot, C.; Skeel, R.D.; Kalé, L.; Schulten, K. Scalable molecular dynamics with NAMD. *J. Comput. Chem.* 2005, 26, 1781–1802.
150. Kim, S.; Oshima, H.; Zhang, H.; Kern, N.R.; Re, S.; Lee, J.; Rous, B.; Sugita, Y.; Jiang, W.; Im, W. CHARMM-GUI free energy calculator for absolute and relative ligand solvation and binding free energy simulations. *J. Chem. Theory Comput.* 2020, 16, 7207– 7218.
151. Ngo, S.T.; Tam, N.M.; Quan, P.M.; Nguyen, T.H. Benchmark of Popular Free Energy Approaches Revealing the Inhibitors Binding to SARS-CoV-2 Mpro. *J. Chem. Inf. Model.* 2021, 61, 2302–2312.
